# Supplementary material for: P2RY14 cAMP signaling regulates Schwann cell precursor self-renewal, proliferation, and nerve tumor initiation in a mouse model of neurofibromatosis
Source: eLife journal article supplement (doi:10.7554/elife.73511), 2022-03-21

11/21/18  
V4

HER2  
(290P)  
x1000

α-GFP  
(Roche)  
x1000

29h 7.C

| GFP 2P |      |      |     |      | GFP 2P |      |      |      |      |      |      |      |
|--------|------|------|-----|------|--------|------|------|------|------|------|------|------|
| mock   | p2YH | EGFR | p2Y | EGFR | HER2   | HER2 | p2YH | mock | p2YH | HER2 | HER2 | p2YH |

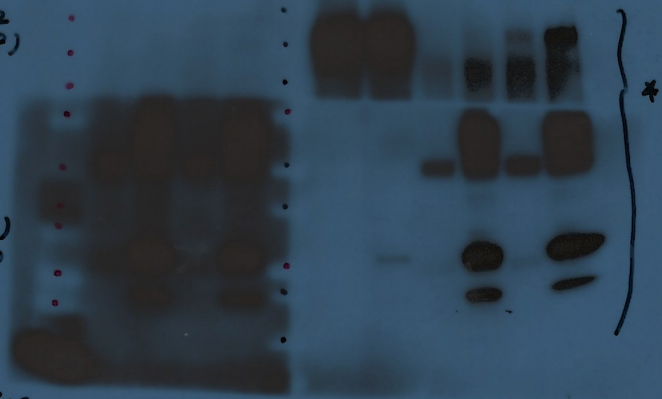

\* no further  
1.2 Abs  
only 5CL

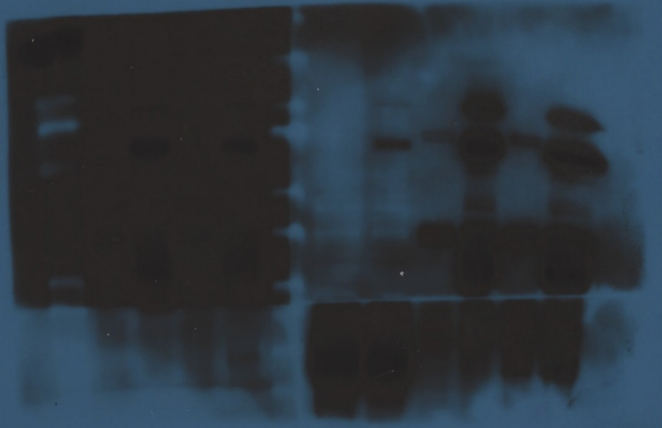

Supplement: supp [file elife-73511-supp-v1.zip]
