# Supplementary material for: P2RY14 cAMP signaling regulates Schwann cell precursor self-renewal, proliferation, and nerve tumor initiation in a mouse model of neurofibromatosis
Source: eLife journal article supplement (doi:10.7554/elife.73511), 2022-03-21
Supplement: supp [file elife-73511-supp-v1.zip]

# ST88-14 MPNST cells

20 min

| p2814: | - | - | 62.5 | 125 | 250 | 500 |
|--------|---|---|------|-----|-----|-----|
| EGF    | - | + | +    | +   | +   | +   |

pAKT-
