# Supplementary material for: P2RY14 cAMP signaling regulates Schwann cell precursor self-renewal, proliferation, and nerve tumor initiation in a mouse model of neurofibromatosis
Source: eLife journal article supplement (doi:10.7554/elife.73511), 2022-03-21
Supplement: supp [file elife-73511-supp-v1.zip]

1111
