# Supplementary figures and images for: P2RY14 cAMP signaling regulates Schwann cell precursor self-renewal, proliferation, and nerve tumor initiation in a mouse model of neurofibromatosis
Source: eLife journal article supplement (doi:10.7554/elife.73511), 2022-03-21

P2Y<sub>1</sub>4i

EGF

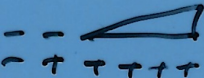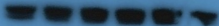

Supplement: supp [file elife-73511-supp-v1.zip]

1 lamda

|                  |                                                                                     |                                                                                     |                                                                                     |                                                                                     |                                                                                     |                                                                                     |                                                                                     |                                                                                      |                                                                                       |                                                                                       |                                                                                       |                                                                                       |
|------------------|-------------------------------------------------------------------------------------|-------------------------------------------------------------------------------------|-------------------------------------------------------------------------------------|-------------------------------------------------------------------------------------|-------------------------------------------------------------------------------------|-------------------------------------------------------------------------------------|-------------------------------------------------------------------------------------|--------------------------------------------------------------------------------------|---------------------------------------------------------------------------------------|---------------------------------------------------------------------------------------|---------------------------------------------------------------------------------------|---------------------------------------------------------------------------------------|
| UDP              | -                                                                                   | -                                                                                   | -                                                                                   | -                                                                                   | -                                                                                   | +                                                                                   | +                                                                                   | +                                                                                    | -                                                                                     | +                                                                                     | +                                                                                     | +                                                                                     |
| P2RY14 inhibitor | -                                                                                   | -                                                                                   | -                                                                                   | -                                                                                   | +                                                                                   | -                                                                                   | +                                                                                   | +                                                                                    | +                                                                                     | -                                                                                     | -                                                                                     | -                                                                                     |
| IBMX             | +                                                                                   | -                                                                                   | +                                                                                   | -                                                                                   | +                                                                                   | +                                                                                   | +                                                                                   | +                                                                                    | +                                                                                     | +                                                                                     | +                                                                                     | +                                                                                     |
| b-actin-         |  |  |  |  |  |  |  |  |  |  |  |  |

Supplement: supp [file elife-73511-supp-v1.zip]

1 lambda

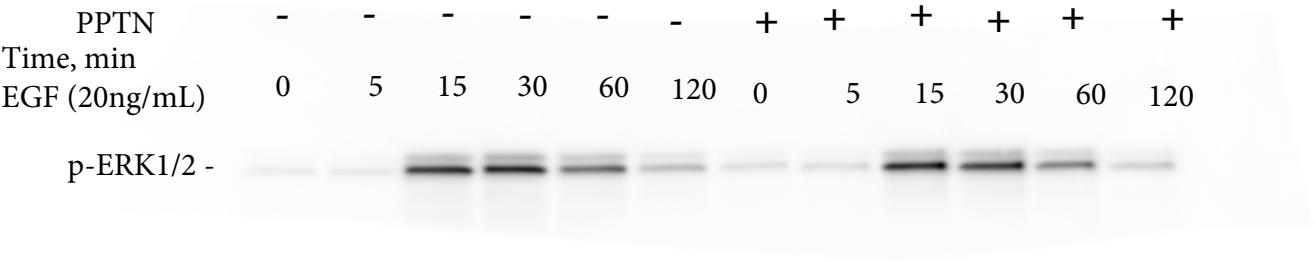

Supplement: supp [file elife-73511-supp-v1.zip]

1 lambda

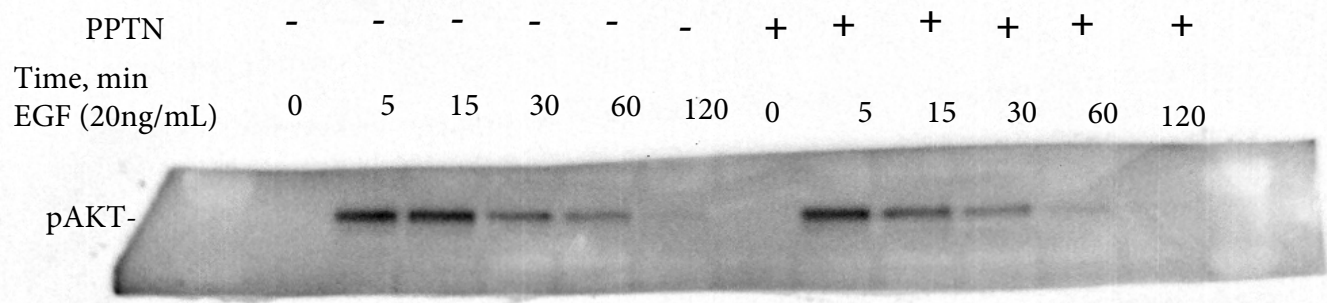

Supplement: supp [file elife-73511-supp-v1.zip]

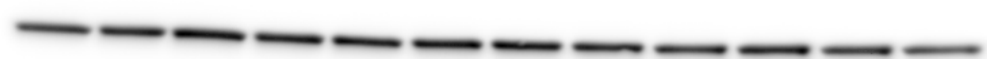

Supplement: supp [file elife-73511-supp-v1.zip]

1 lambda delta Nf1

|               |   |   |    |    |    |     |   |   |    |    |    |     |
|---------------|---|---|----|----|----|-----|---|---|----|----|----|-----|
| PPTN          | - | - | -  | -  | -  | -   | + | + | +  | +  | +  | +   |
| Time, min     | 0 | 5 | 15 | 30 | 60 | 120 | 0 | 5 | 15 | 30 | 60 | 120 |
| EGF (20ng/mL) |   |   |    |    |    |     |   |   |    |    |    |     |

p-AKT -

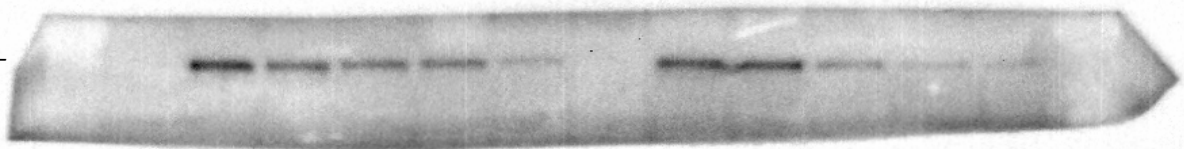

Supplement: supp [file elife-73511-supp-v1.zip]

1 lambda  
delta NF

|                     |                                                                                   |                                                                                   |                                                                                   |                                                                                   |                                                                                   |                                                                                   |                                                                                   |                                                                                   |                                                                                   |                                                                                    |                                                                                     |                                                                                     |
|---------------------|-----------------------------------------------------------------------------------|-----------------------------------------------------------------------------------|-----------------------------------------------------------------------------------|-----------------------------------------------------------------------------------|-----------------------------------------------------------------------------------|-----------------------------------------------------------------------------------|-----------------------------------------------------------------------------------|-----------------------------------------------------------------------------------|-----------------------------------------------------------------------------------|------------------------------------------------------------------------------------|-------------------------------------------------------------------------------------|-------------------------------------------------------------------------------------|
| UDP                 | -                                                                                 | -                                                                                 | -                                                                                 | -                                                                                 | -                                                                                 | +                                                                                 | +                                                                                 | +                                                                                 | -                                                                                 | +                                                                                  | +                                                                                   | +                                                                                   |
| P2RY14<br>inhibitor | -                                                                                 | -                                                                                 | -                                                                                 | -                                                                                 | +                                                                                 | -                                                                                 | +                                                                                 | +                                                                                 | +                                                                                 | -                                                                                  | -                                                                                   | -                                                                                   |
| IBMX                | +                                                                                 | -                                                                                 | +                                                                                 | -                                                                                 | +                                                                                 | +                                                                                 | +                                                                                 | +                                                                                 | +                                                                                 | +                                                                                  | +                                                                                   | +                                                                                   |
| b-actin-            |  |  |  |  |  |  |  |  |  |  |  |  |

Supplement: supp [file elife-73511-supp-v1.zip]

WT

shNT shP2RY14

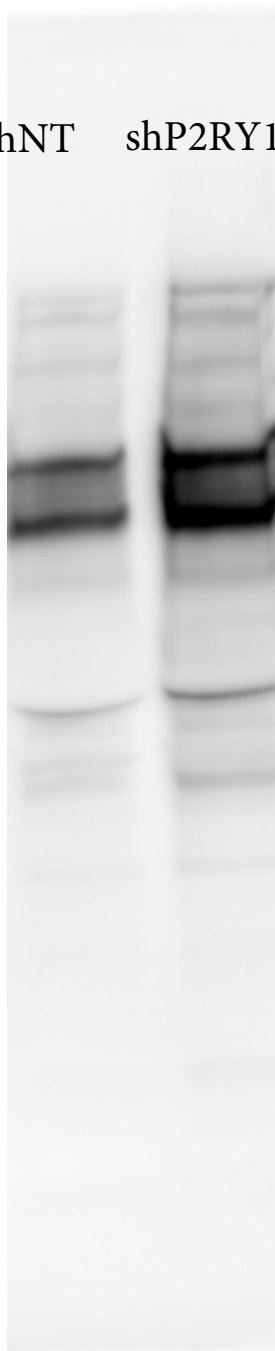

Supplement: supp [file elife-73511-supp-v1.zip]

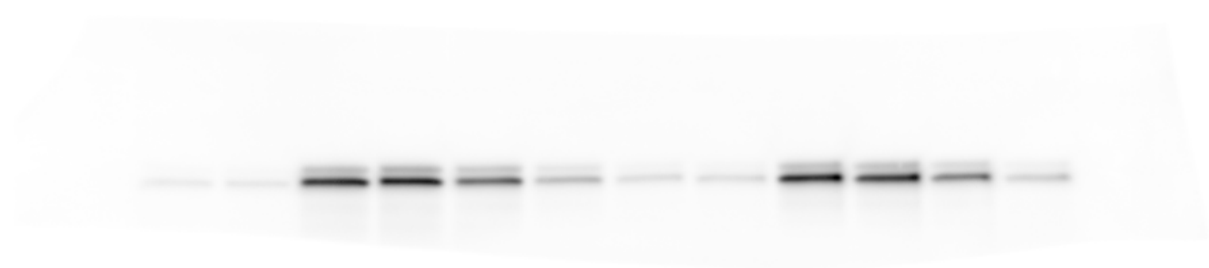

Supplement: supp [file elife-73511-supp-v1.zip]

sciatic

Nf1 fl/fl  
Dhh+

P2RY14  
Nf1 fl/fl  
Dhh+

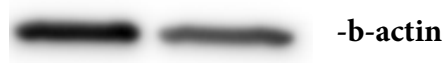

Supplement: supp [file elife-73511-supp-v1.zip]

Nf1 fl/fl Dhh+  
Vehicle

Nf1 fl/fl Dhh+  
Rolipram 5mg/kg

pPKA  
substrate  
RRXS\*/T\*

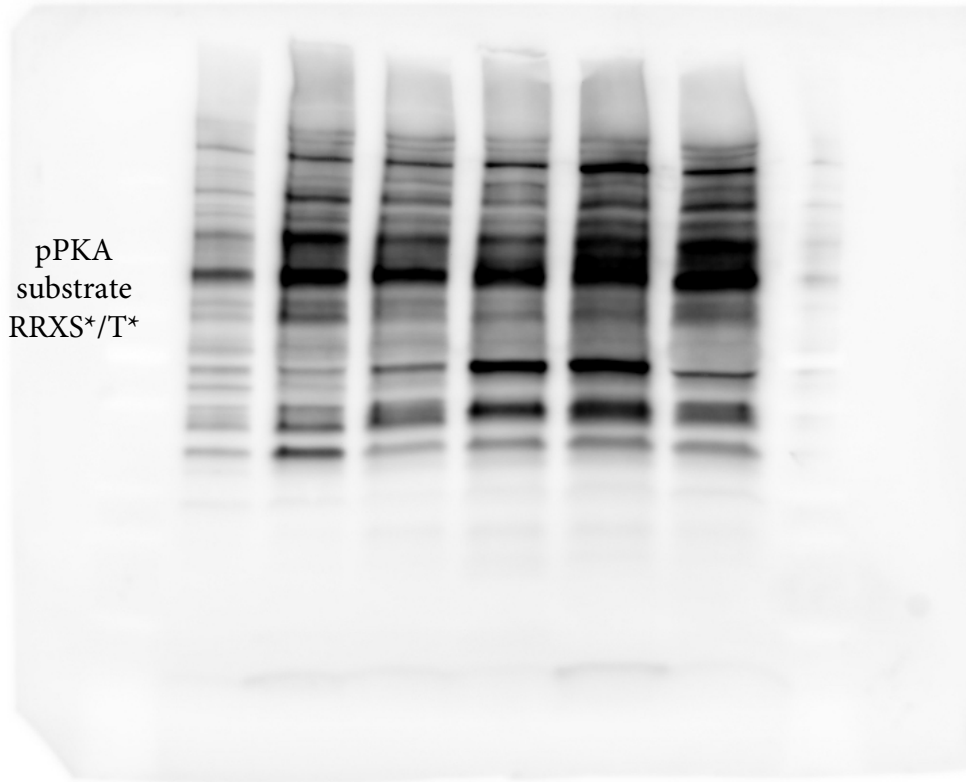

Supplement: supp [file elife-73511-supp-v1.zip]

1 lambda  
delta NF

|                     |   |   |   |   |   |   |   |   |   |   |   |   |
|---------------------|---|---|---|---|---|---|---|---|---|---|---|---|
| UDP                 | - | - | - | - | - | + | + | + | - | + | + | + |
| P2RY14<br>inhibitor | - | - | - | - | + | - | + | + | + | - | - | - |
| IBMX                | + | - | + | - | + | + | + | + | + | + | + | + |

p-CREB-

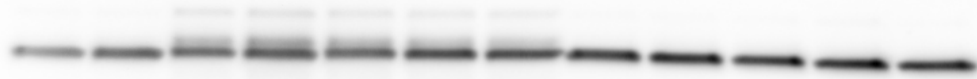

Supplement: supp [file elife-73511-supp-v1.zip]

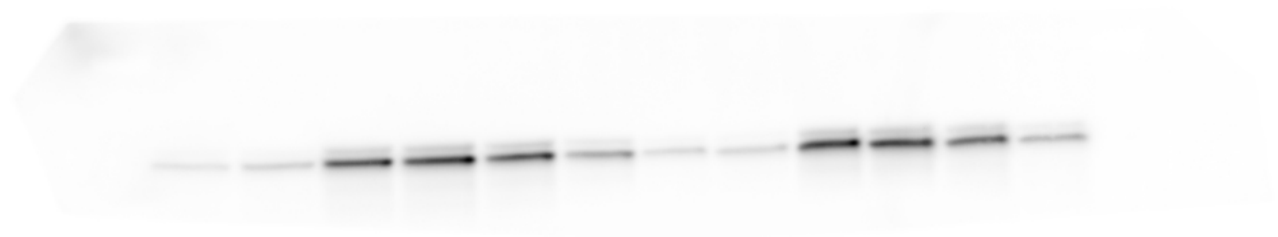

Supplement: supp [file elife-73511-supp-v1.zip]

1 lambda

|                  |   |   |   |   |   |   |   |   |   |   |   |   |
|------------------|---|---|---|---|---|---|---|---|---|---|---|---|
| UDP              | - | - | - | - | - | + | + | + | - | + | + | + |
| P2RY14 inhibitor | - | - | - | - | + | - | + | + | + | - | - | - |
| IBMX             | + | - | + | - | + | + | + | + | + | + | + | + |

p-CREB-



Supplement: supp [file elife-73511-supp-v1.zip]

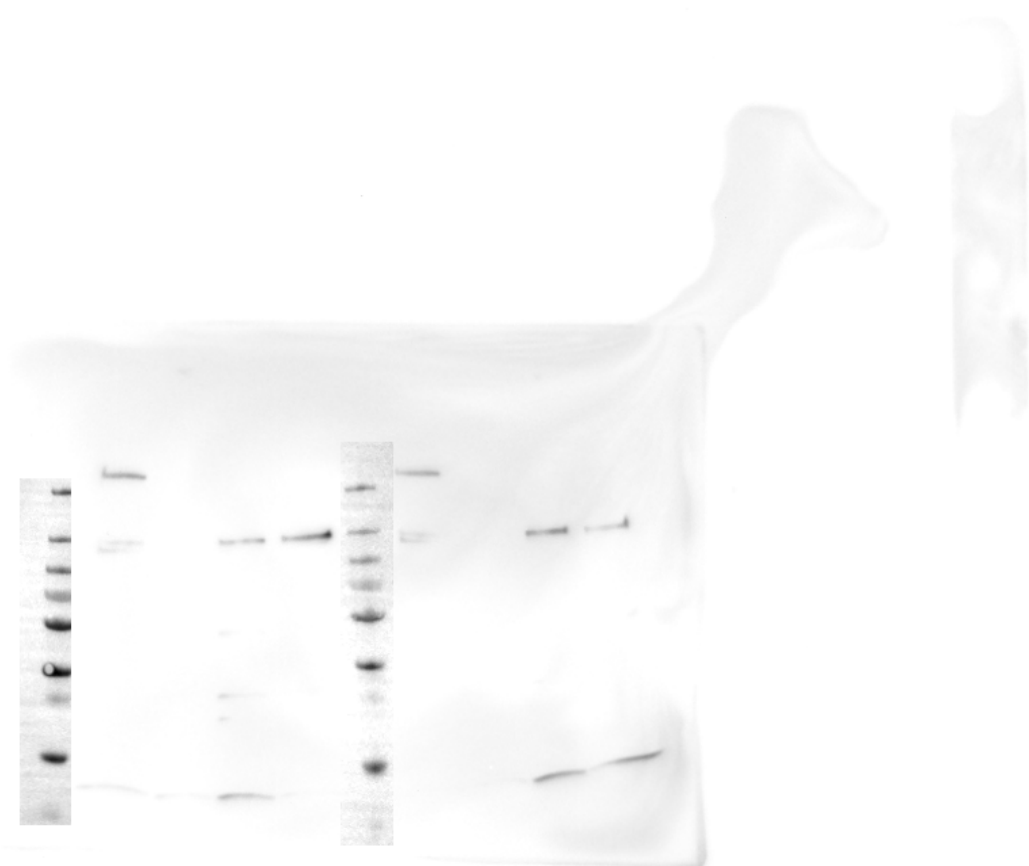

Supplement: supp [file elife-73511-supp-v1.zip]

# 1 lambda delta Nf1

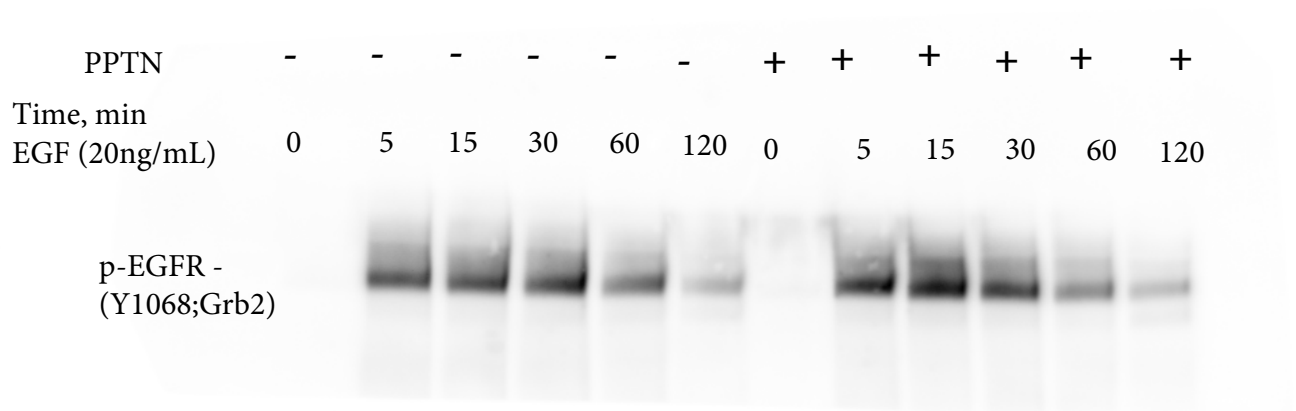

Supplement: supp [file elife-73511-supp-v1.zip]

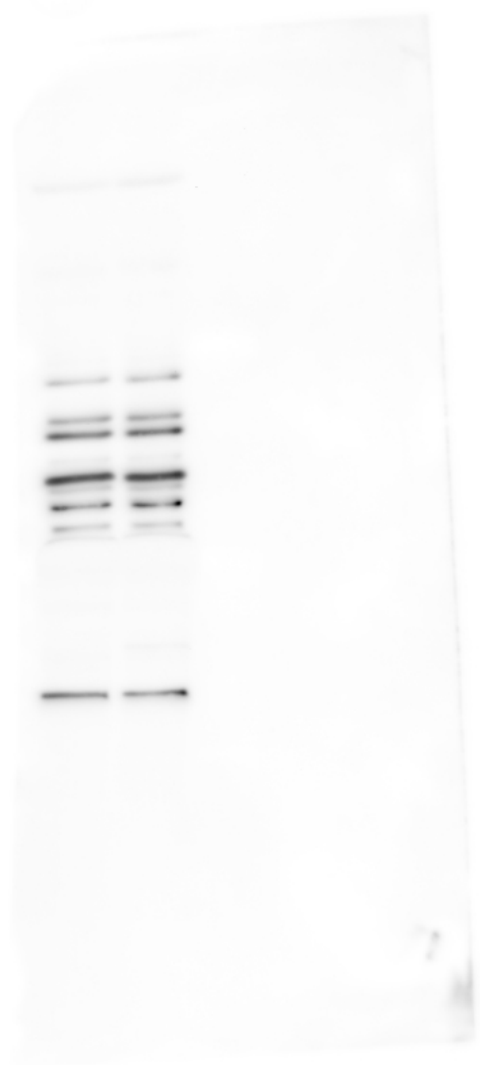

Supplement: supp [file elife-73511-supp-v1.zip]

---

mouse SCP

WT Nf1<sup>-/-</sup>

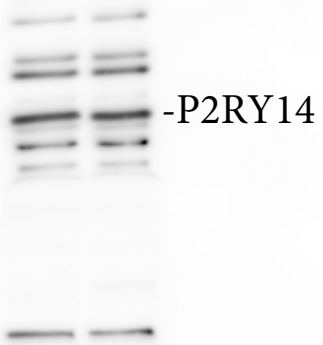

Supplement: supp [file elife-73511-supp-v1.zip]

ST88-14 MPNST cells

57

20 min

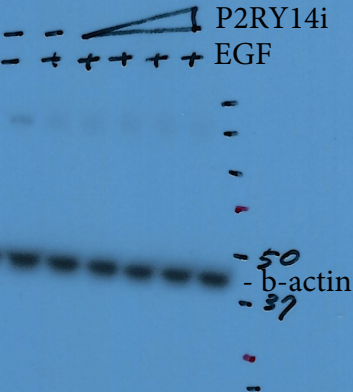

Supplement: supp [file elife-73511-supp-v1.zip]

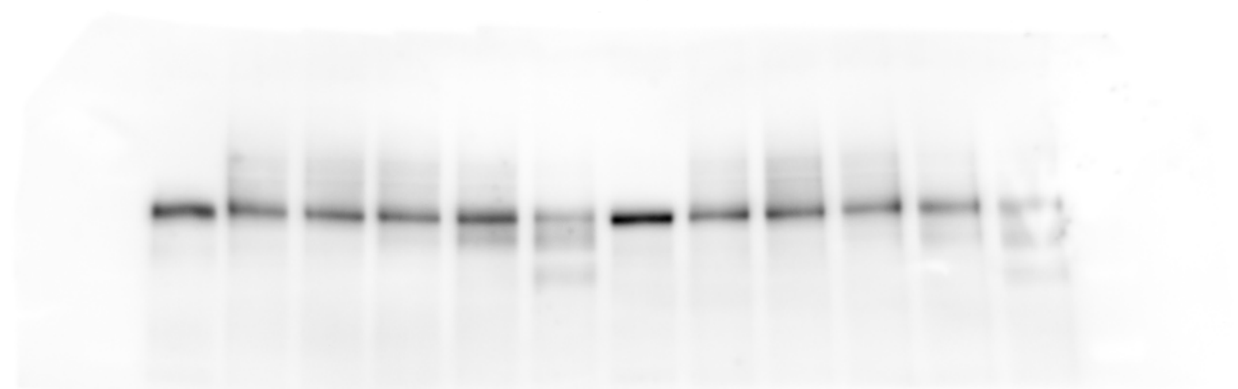

Supplement: supp [file elife-73511-supp-v1.zip]

# ST88-14 MPNST cells

P2RY14i - - - - - + + + + +

EGF 0 5 10 15 20 30 0 5 10 15 20 30 EGF (min)

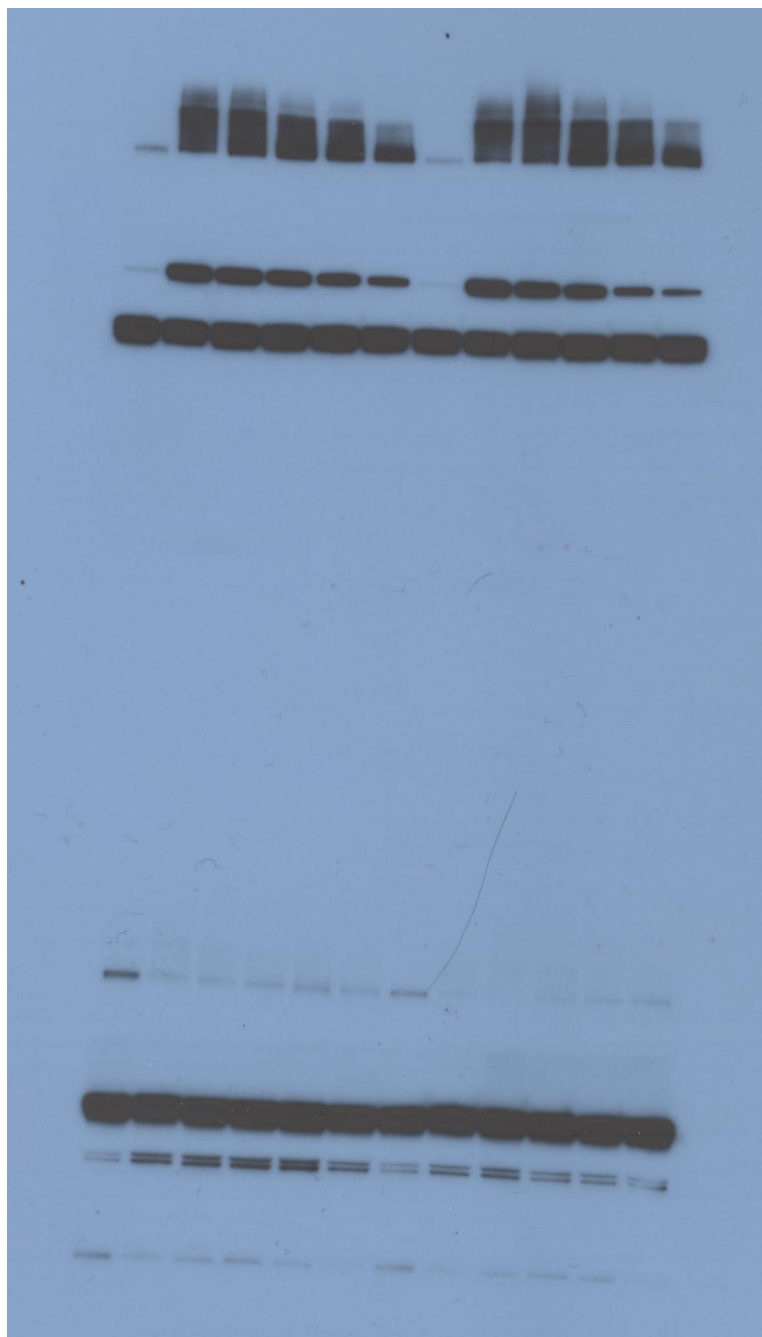

- pEGFR  
(Y1068;Grb2)

- pERK1/2  
(T202)/Y204

Supplement: supp [file elife-73511-supp-v1.zip]

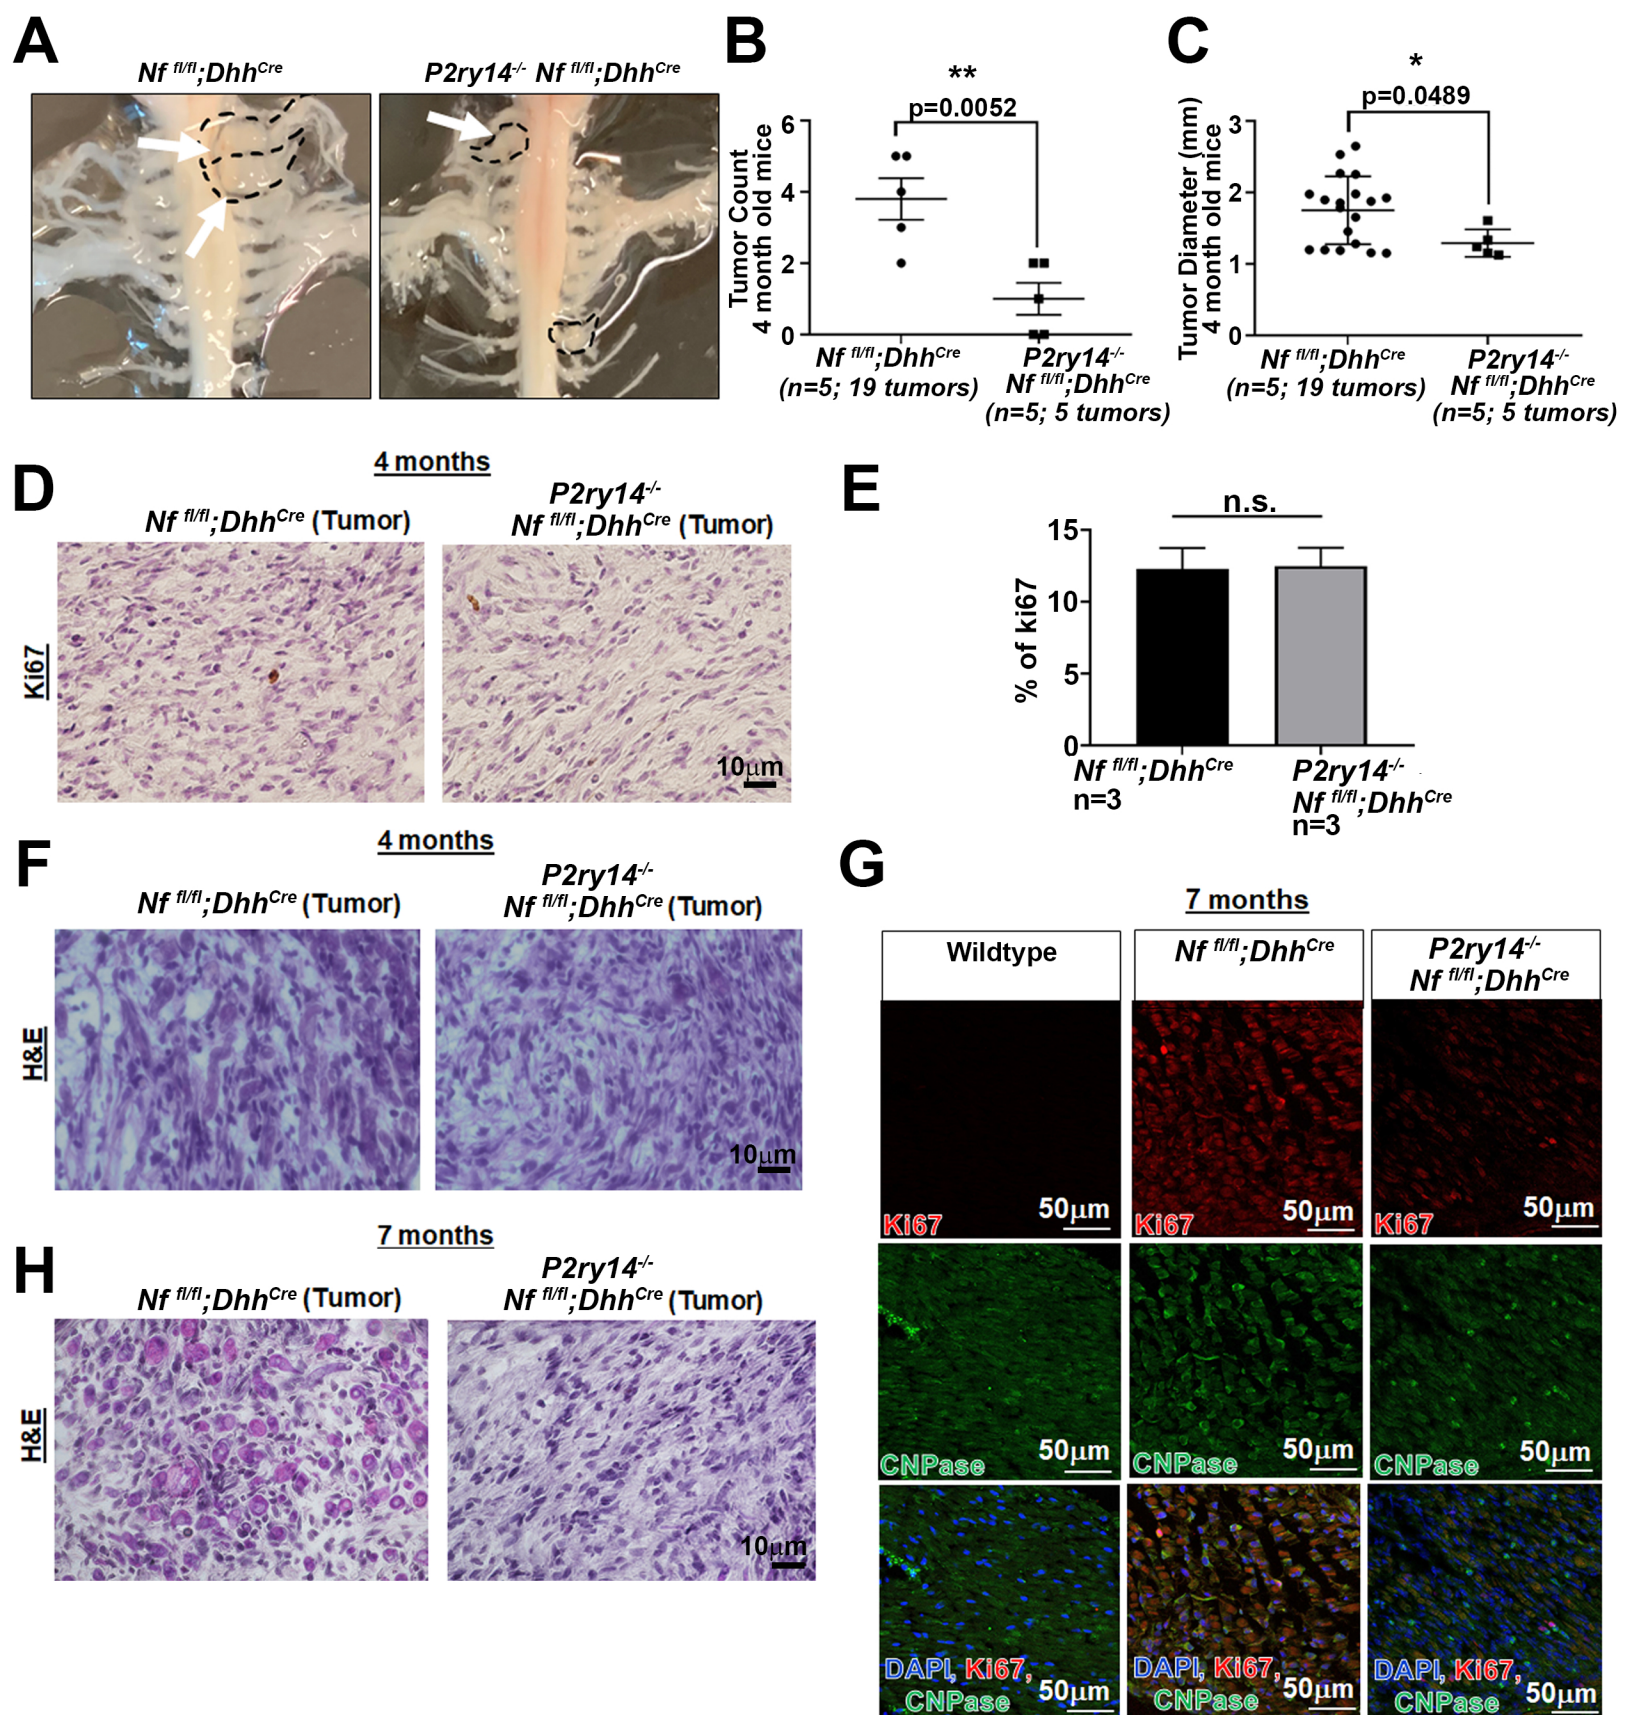

Figure S4

Supplement: supp [file elife-73511-supp-v1.zip]

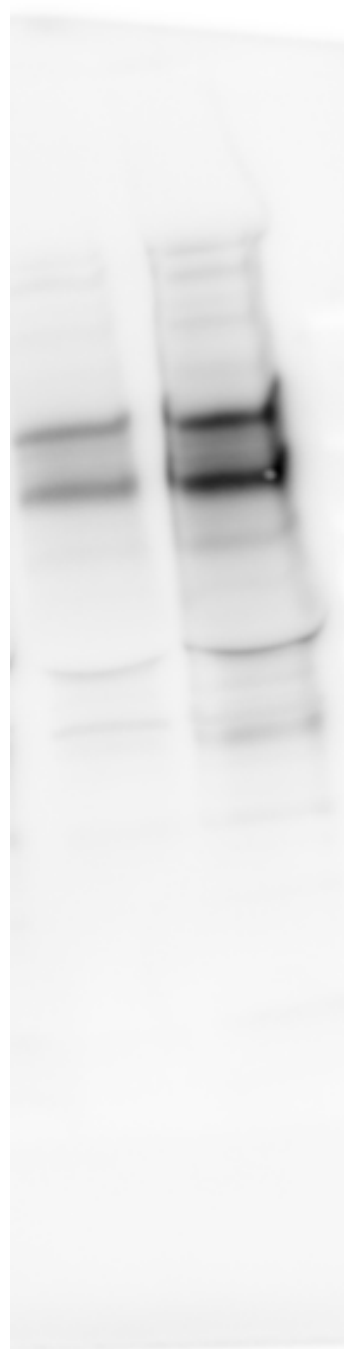

Supplement: supp [file elife-73511-supp-v1.zip]

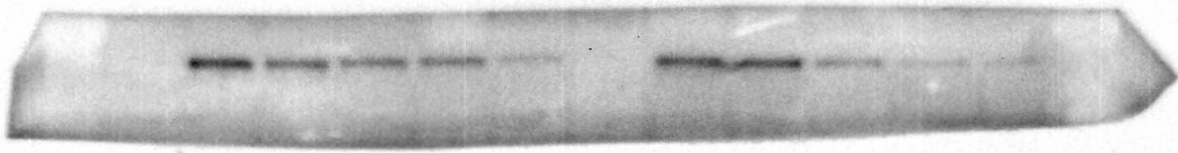

Supplement: supp [file elife-73511-supp-v1.zip]

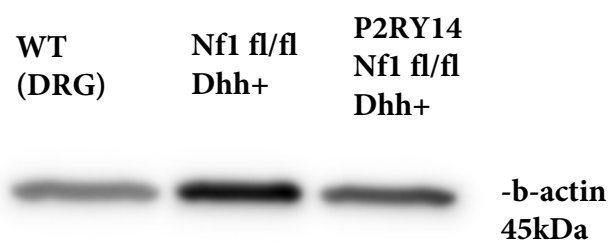

Supplement: supp [file elife-73511-supp-v1.zip]

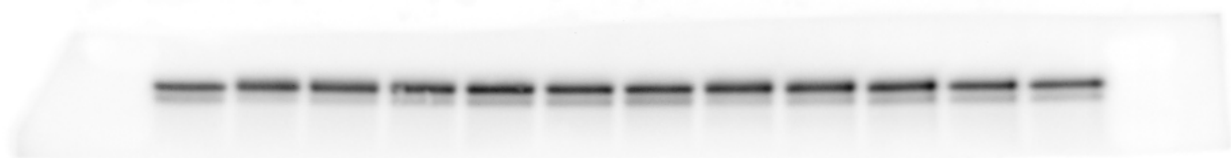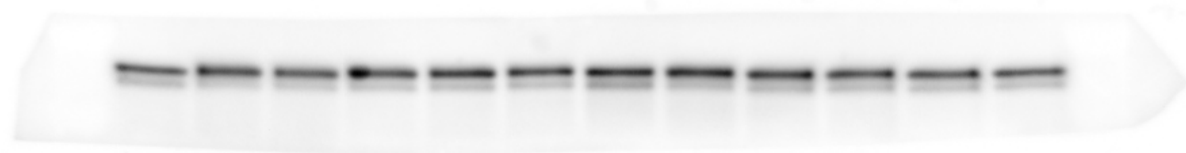

Supplement: supp [file elife-73511-supp-v1.zip]

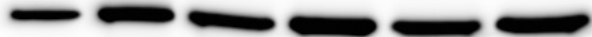

Supplement: supp [file elife-73511-supp-v1.zip]

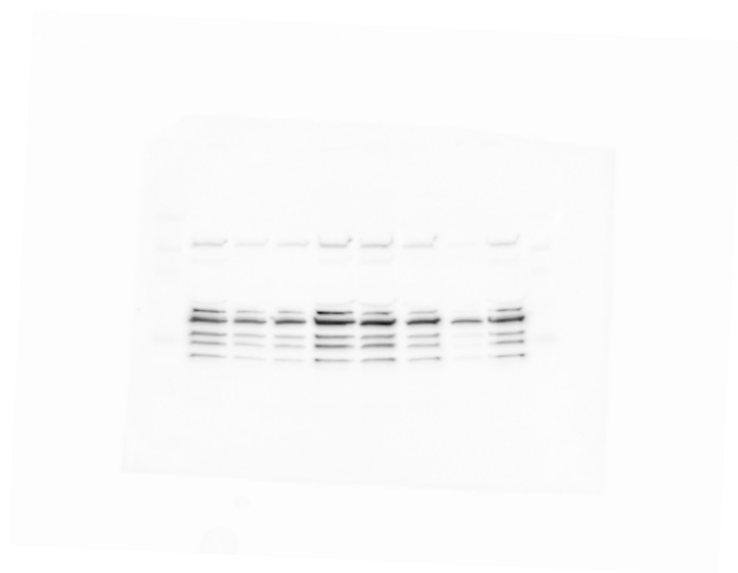

Supplement: supp [file elife-73511-supp-v1.zip]

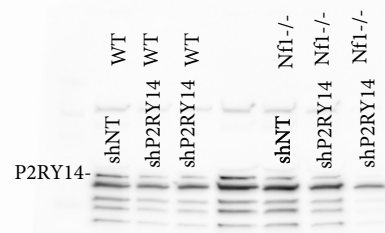

Supplement: supp [file elife-73511-supp-v1.zip]

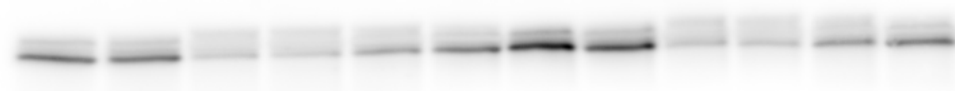

Supplement: supp [file elife-73511-supp-v1.zip]

**1 lambda**

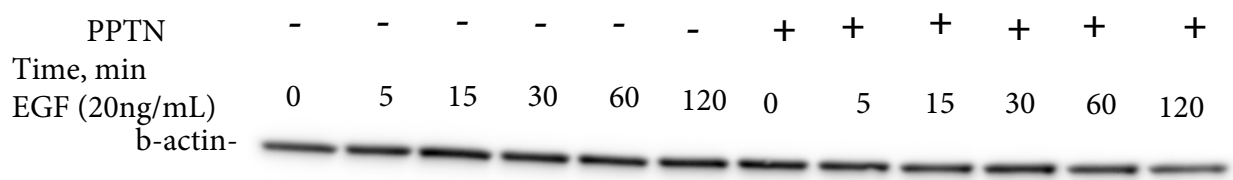

Supplement: supp [file elife-73511-supp-v1.zip]

Figure S1

A

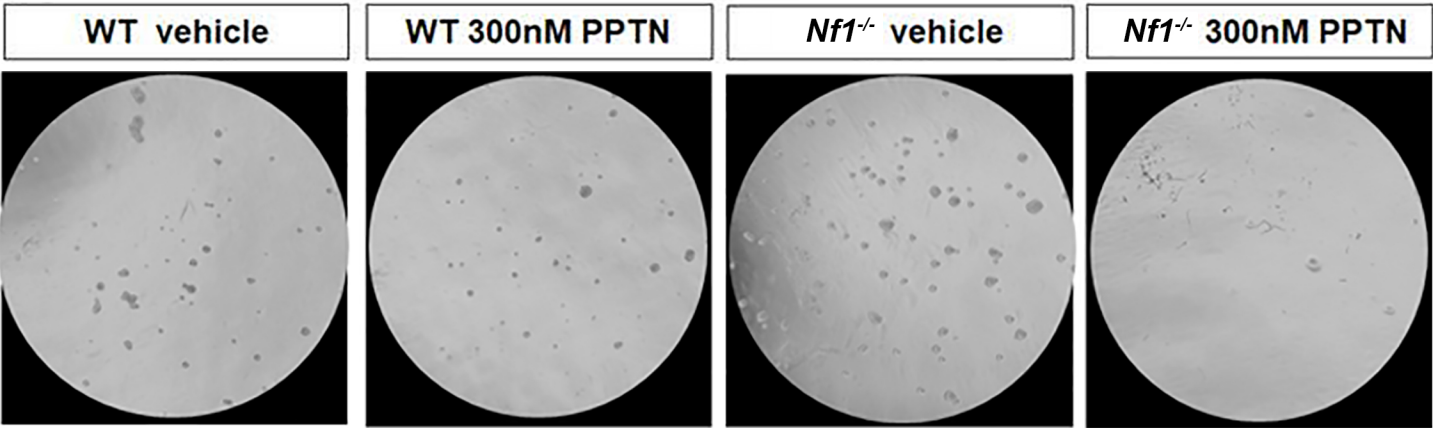

B

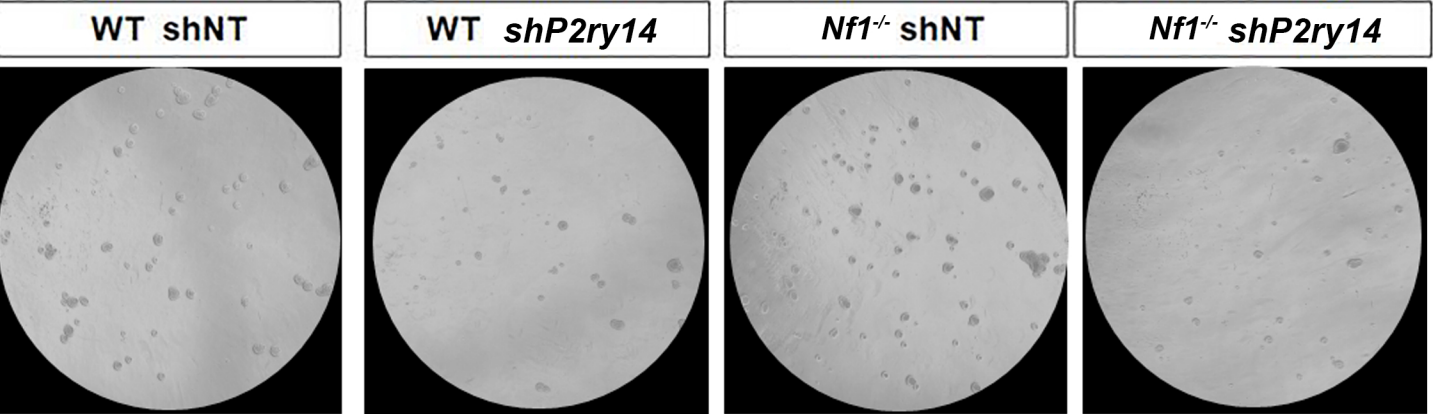

C

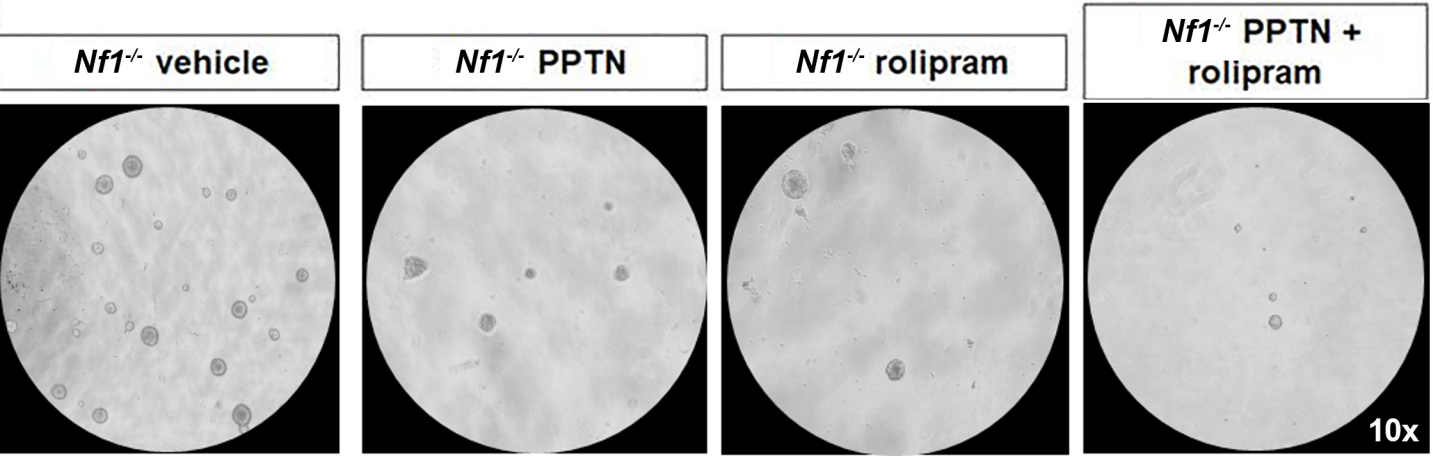

Supplement: supp [file elife-73511-supp-v1.zip]

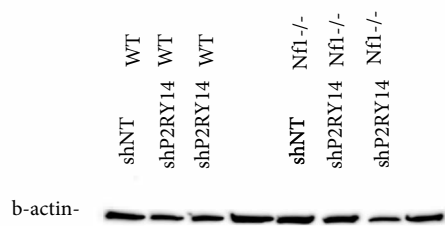

Supplement: supp [file elife-73511-supp-v1.zip]

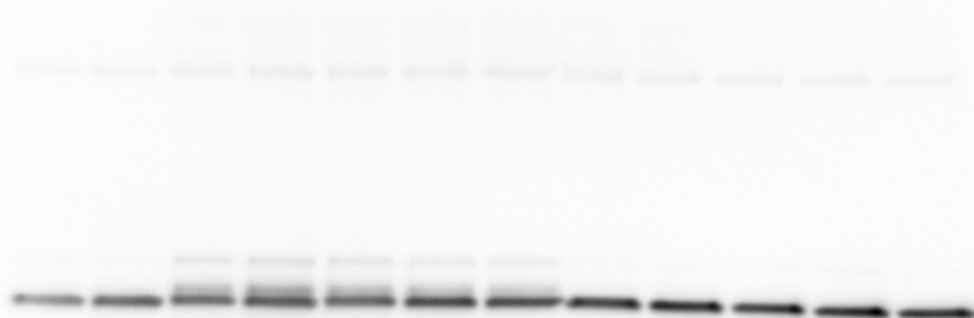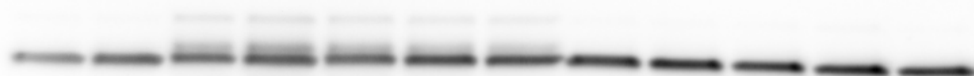

Supplement: supp [file elife-73511-supp-v1.zip]

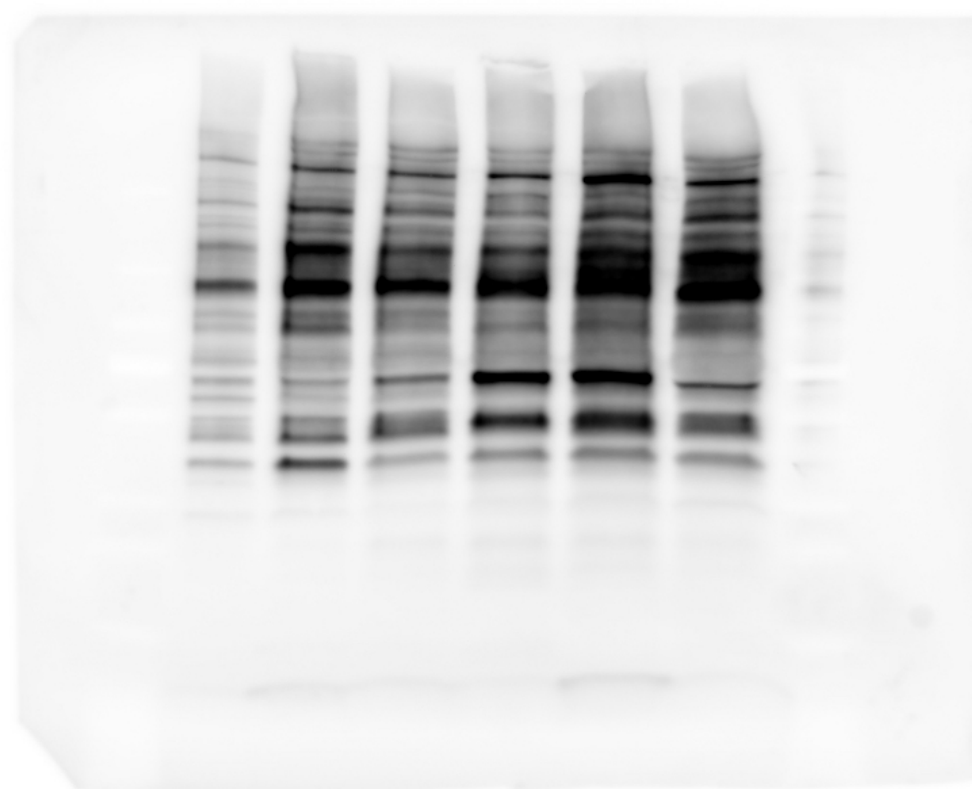

Supplement: supp [file elife-73511-supp-v1.zip]

Nf1 fl/fl Dhh+  
Vehicle

---

Nf1 fl/fl Dhh+  
Rolipram 5mg/kg

---

b-actin-  
45 kDa

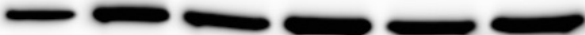

Supplement: supp [file elife-73511-supp-v1.zip]

1/2

ST88-14 MPNST cells

20

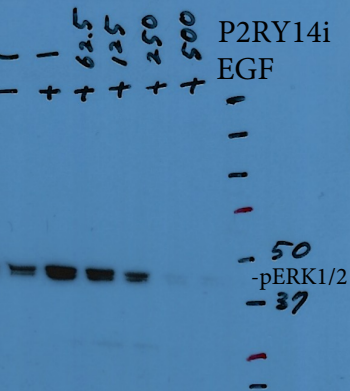

Supplement: supp [file elife-73511-supp-v1.zip]



Supplement: supp [file elife-73511-supp-v1.zip]

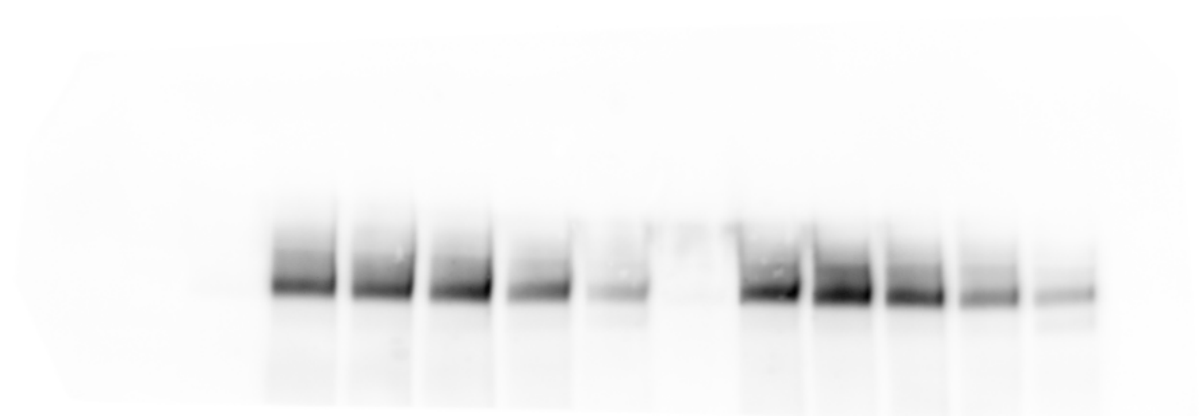

Supplement: supp [file elife-73511-supp-v1.zip]

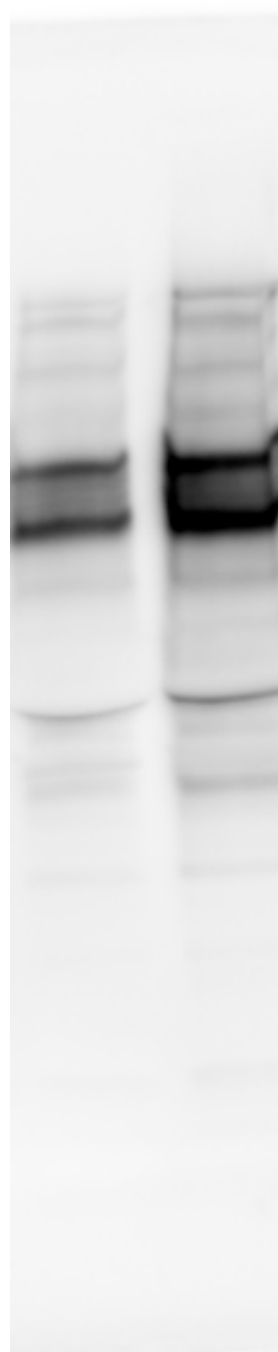

Supplement: supp [file elife-73511-supp-v1.zip]

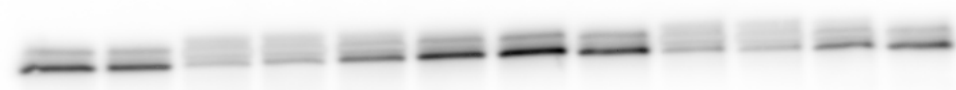

Supplement: supp [file elife-73511-supp-v1.zip]

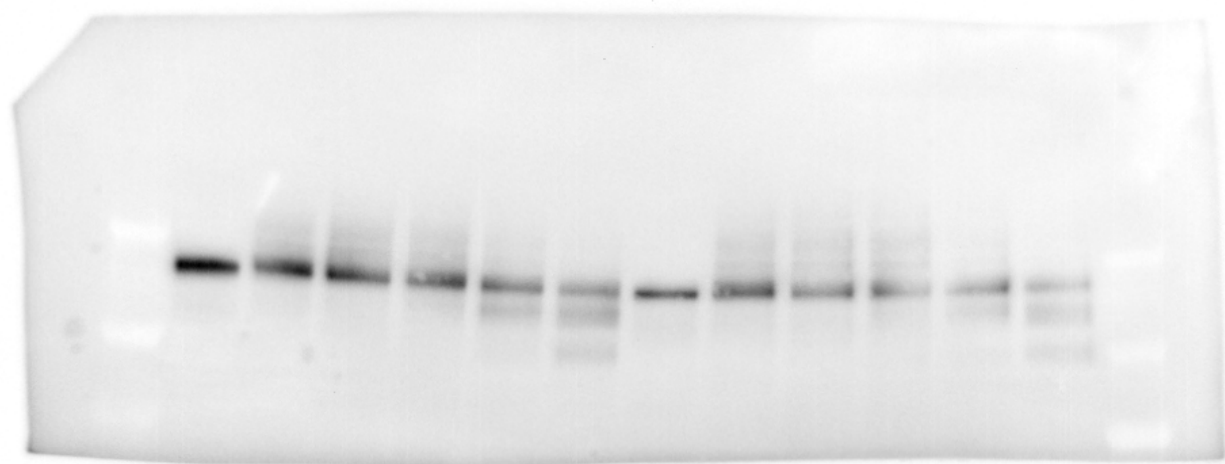

Supplement: supp [file elife-73511-supp-v1.zip]

WT      Nf1<sup>-/-</sup>

 - P2RY14

Supplement: supp [file elife-73511-supp-v1.zip]

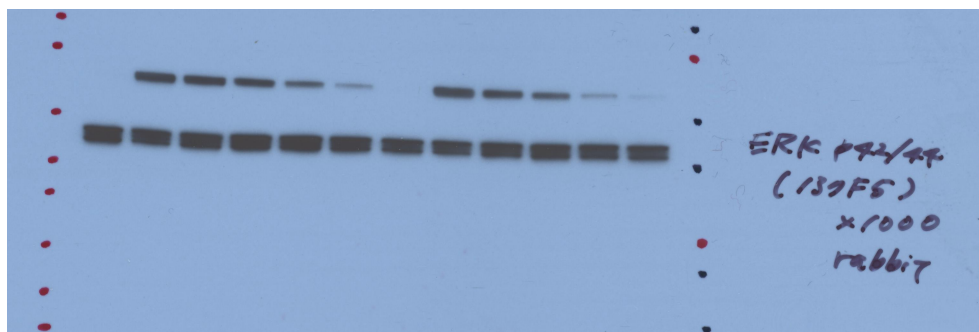

Supplement: supp [file elife-73511-supp-v1.zip]

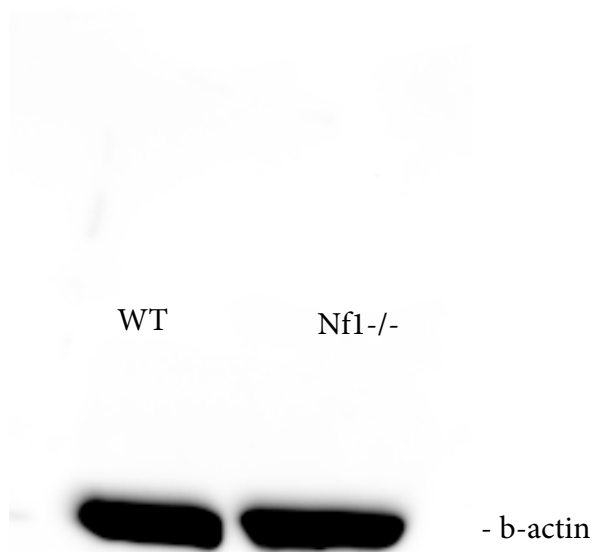

Supplement: supp [file elife-73511-supp-v1.zip]

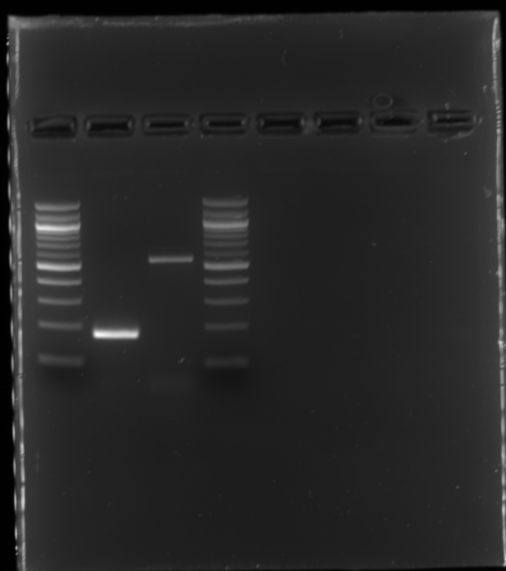

Supplement: supp [file elife-73511-supp-v1.zip]

mouse SCP

WT

Nf1<sup>-/-</sup>

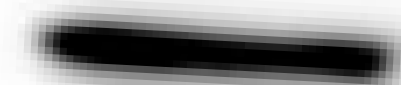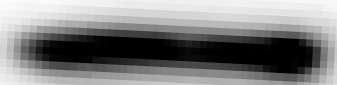

-b-actin

Supplement: supp [file elife-73511-supp-v1.zip]

GAPDH-

iHSC-1lambda

ipNF95.11bc

NF1 #1

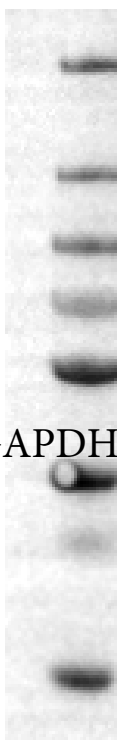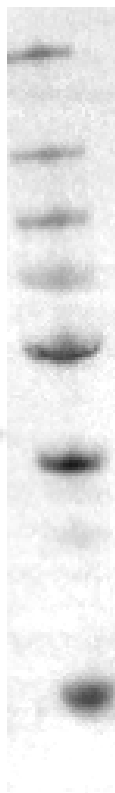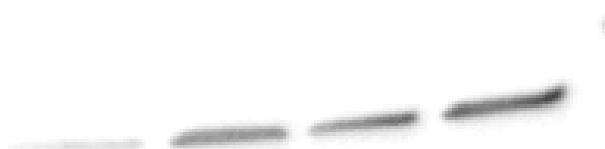

Supplement: supp [file elife-73511-supp-v1.zip]

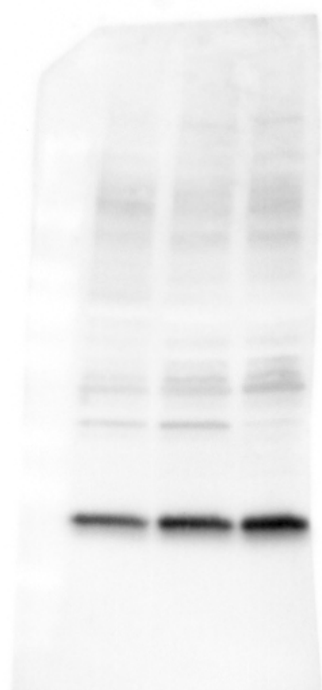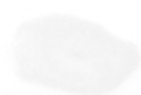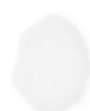

Supplement: supp [file elife-73511-supp-v1.zip]

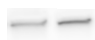

Supplement: supp [file elife-73511-supp-v1.zip]

**1 lambda delta Nf1**

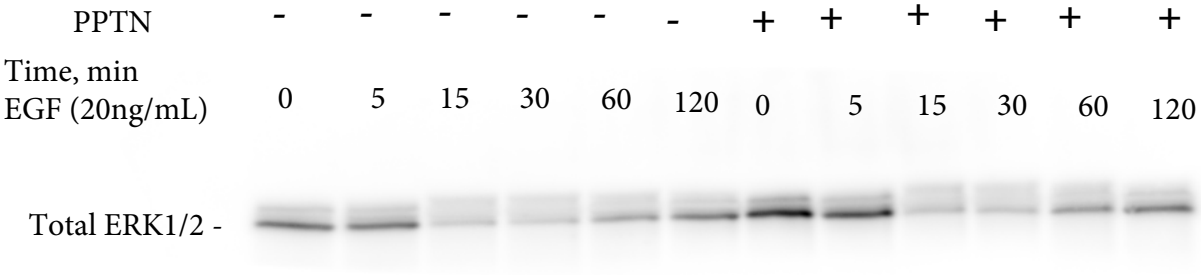

Supplement: supp [file elife-73511-supp-v1.zip]

# ST88-14 MPNST cells

P2Y<sub>1</sub>4i

- - 

EGF

- + + + + +

ERK1/2-

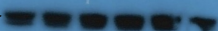

Supplement: supp [file elife-73511-supp-v1.zip]

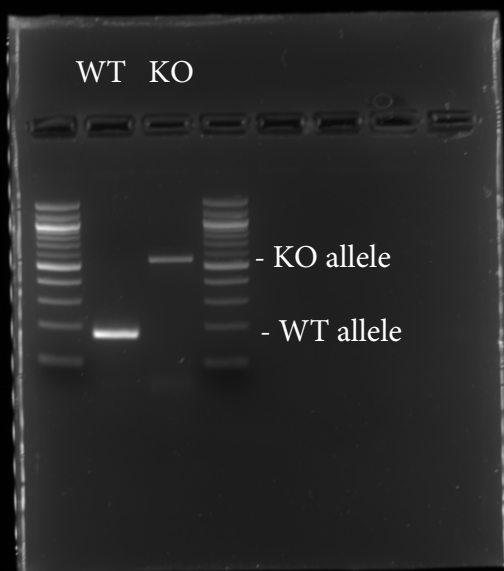

Supplement: supp [file elife-73511-supp-v1.zip]

**neurofibroma**

**Nf1 fl/fl  
Dhh+**

**P2RY14  
Nf1 fl/fl  
Dhh+**

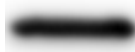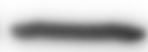

**-b-actin**

Supplement: supp [file elife-73511-supp-v1.zip]

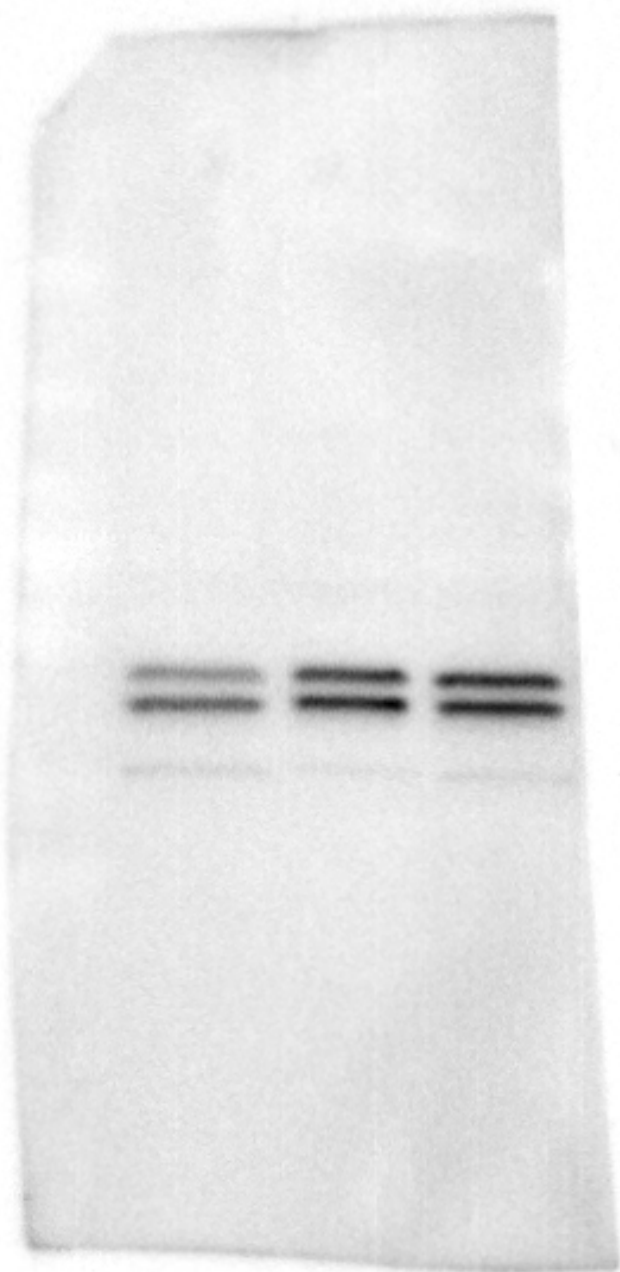

Supplement: supp [file elife-73511-supp-v1.zip]

8/27/08  
Actin

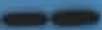

Supplement: supp [file elife-73511-supp-v1.zip]

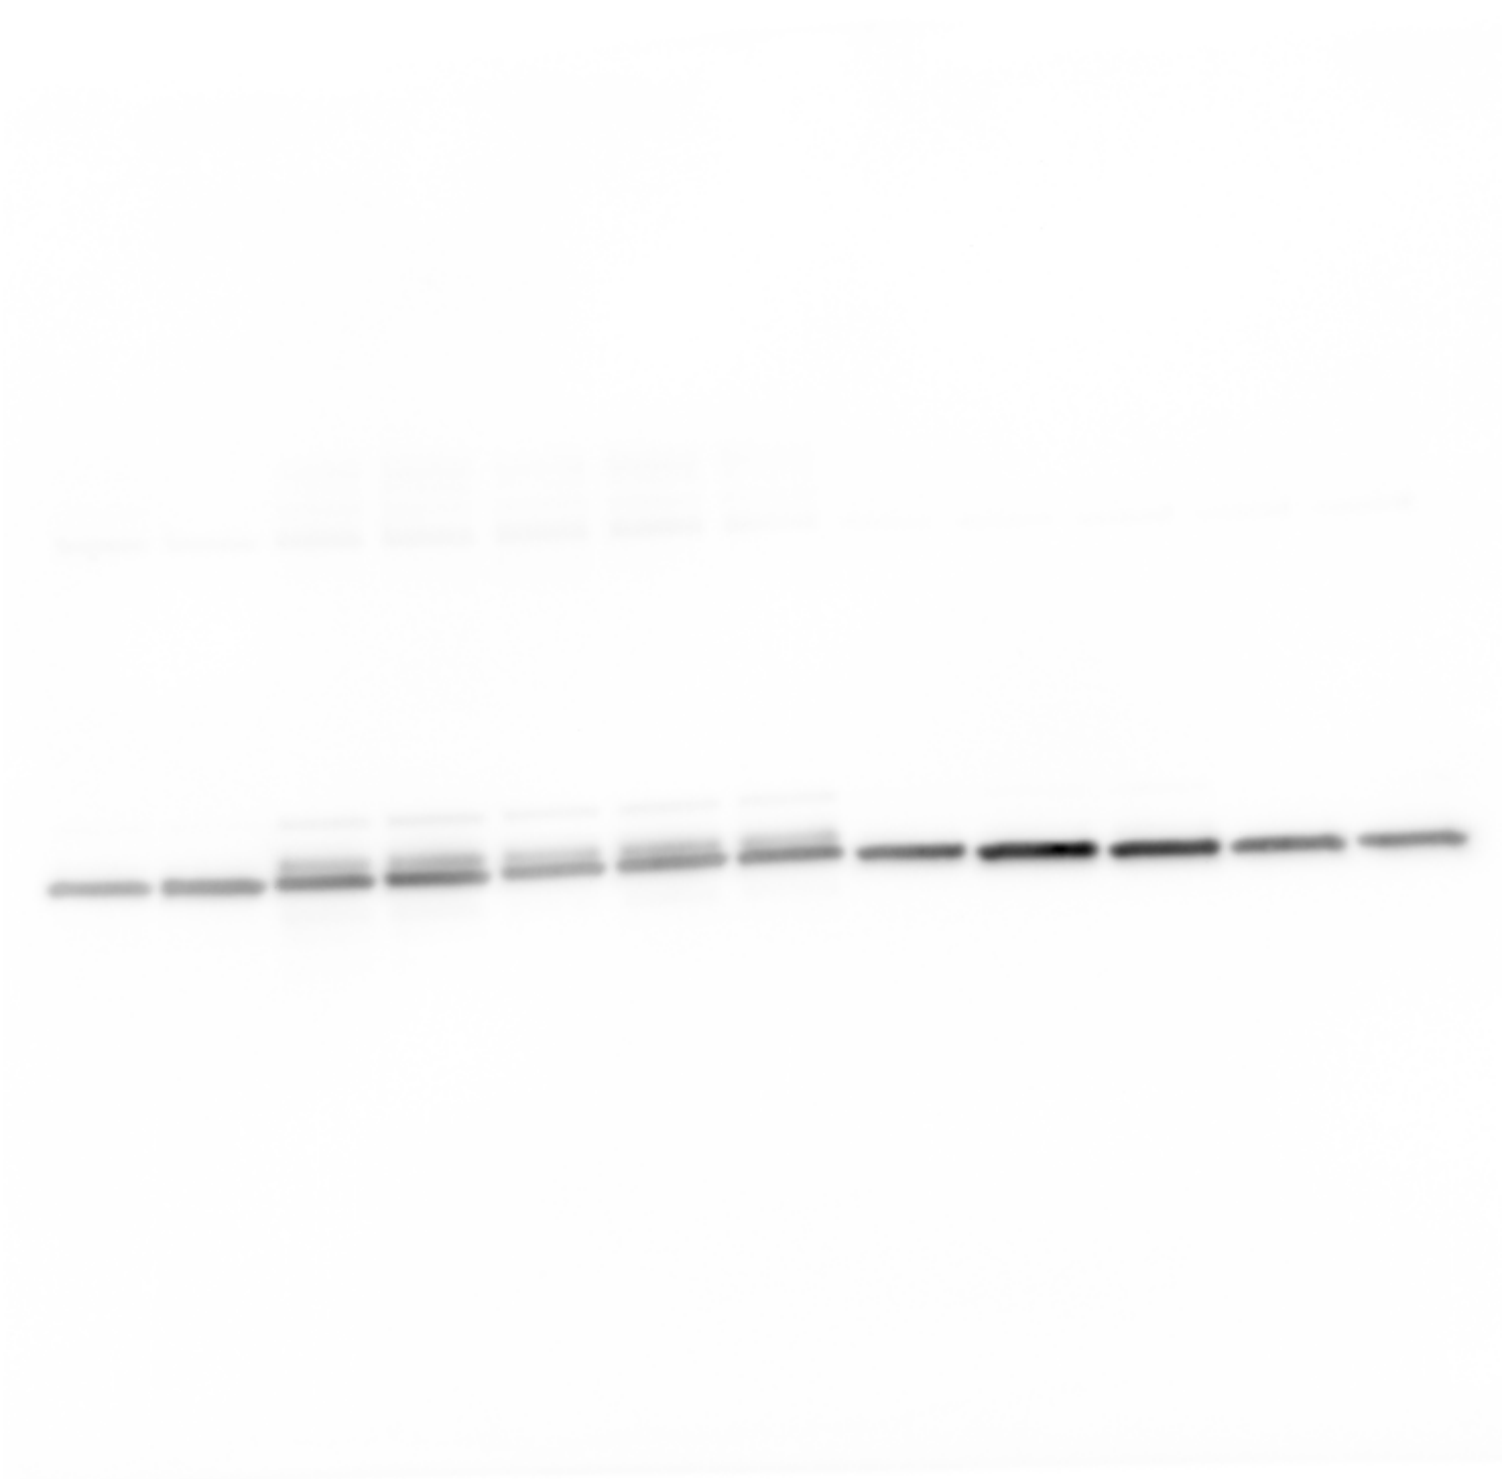

Supplement: supp [file elife-73511-supp-v1.zip]

20 min.

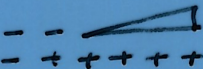

-

-

-

- 50

- 37

-

-

Supplement: supp [file elife-73511-supp-v1.zip]

# ST88-14 MPNST cells

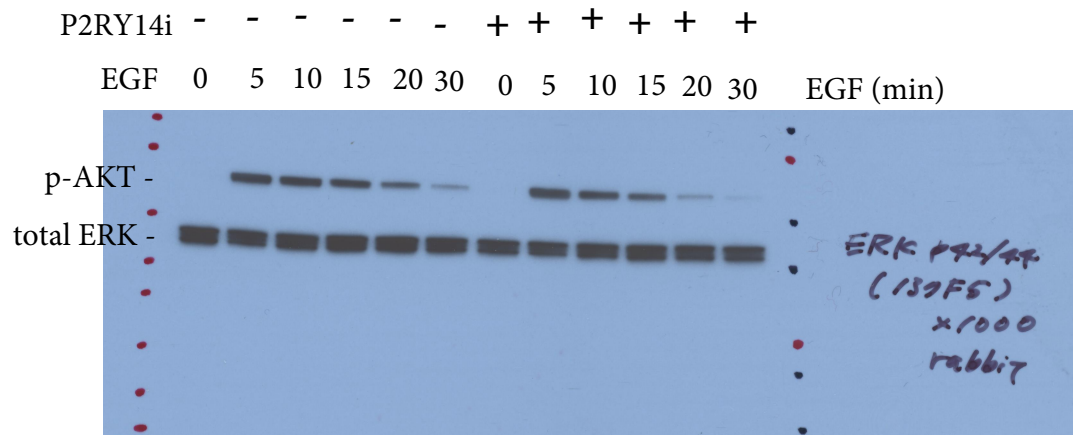

Supplement: supp [file elife-73511-supp-v1.zip]

# 1 lambda

|               |   |   |    |    |    |     |   |   |    |    |    |     |
|---------------|---|---|----|----|----|-----|---|---|----|----|----|-----|
| PPTN          | - | - | -  | -  | -  | -   | + | + | +  | +  | +  | +   |
| Time, min     | 0 | 5 | 15 | 30 | 60 | 120 | 0 | 5 | 15 | 30 | 60 | 120 |
| EGF (20ng/mL) |   |   |    |    |    |     |   |   |    |    |    |     |

total-ERK1/2 -

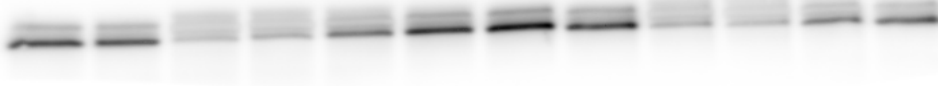

Supplement: supp [file elife-73511-supp-v1.zip]

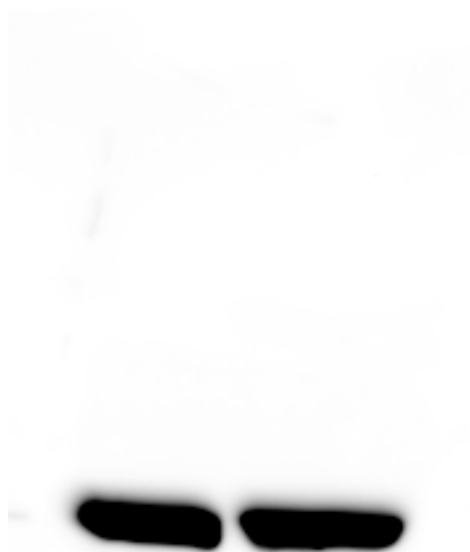

Supplement: supp [file elife-73511-supp-v1.zip]

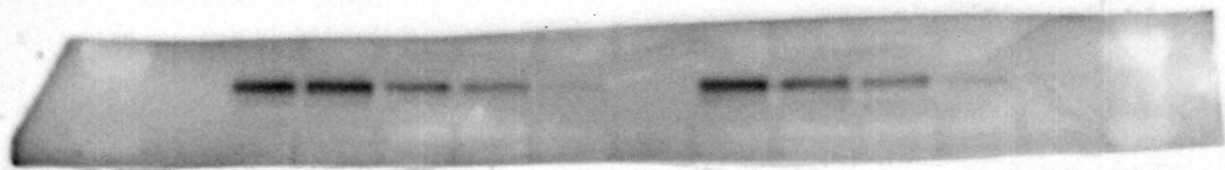

Supplement: supp [file elife-73511-supp-v1.zip]

**WT  
(DRG)**

**Nf1 fl/fl  
Dhh+**

**P2RY14  
Nf1 fl/fl  
Dhh+**

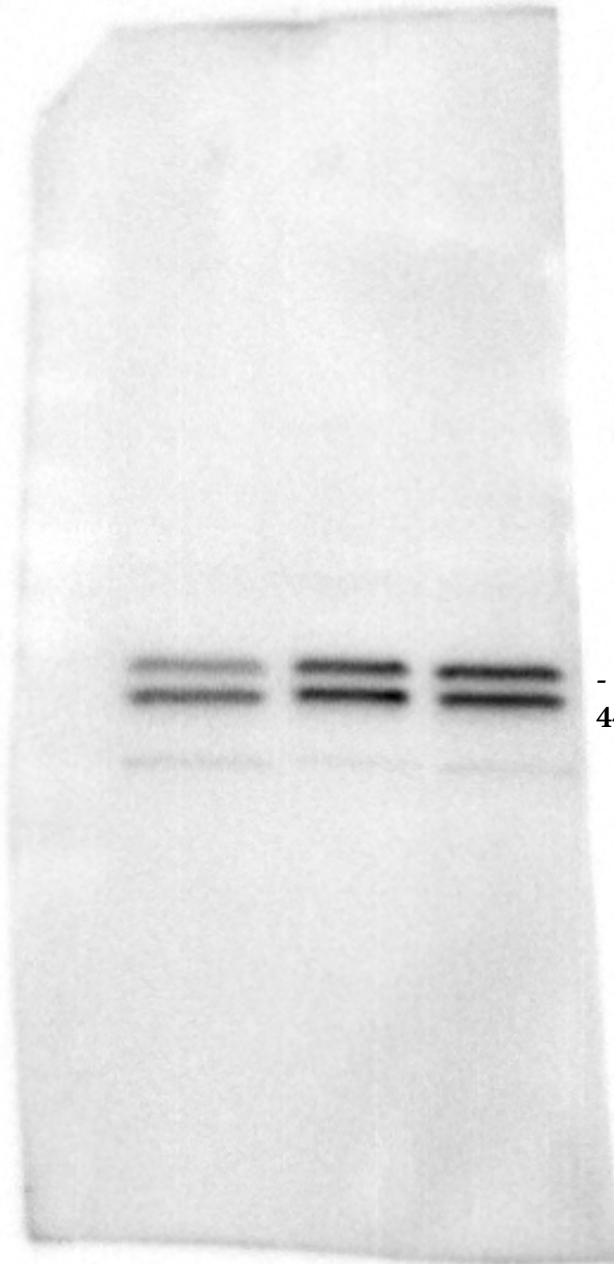

**- p-ERK 1/2  
44/42 kDa**

Supplement: supp [file elife-73511-supp-v1.zip]

**1 lambda delta Nf1**

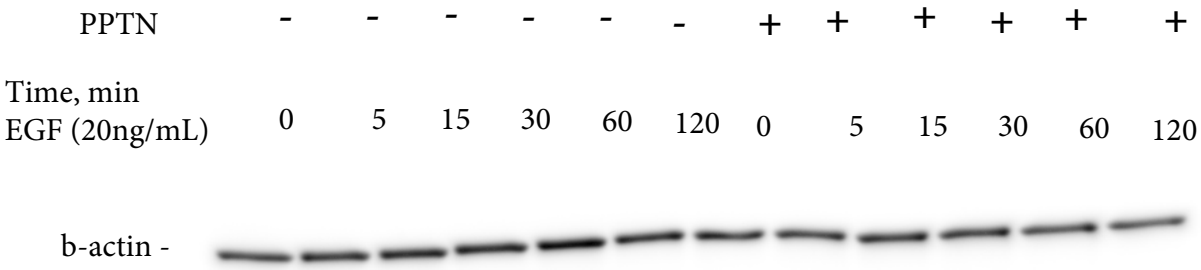

Supplement: supp [file elife-73511-supp-v1.zip]

1 lambda delta Nf1

|               |   |   |    |    |    |     |   |   |    |    |    |     |
|---------------|---|---|----|----|----|-----|---|---|----|----|----|-----|
| PPTN          | - | - | -  | -  | -  | -   | + | + | +  | +  | +  | +   |
| Time, min     | 0 | 5 | 15 | 30 | 60 | 120 | 0 | 5 | 15 | 30 | 60 | 120 |
| EGF (20ng/mL) |   |   |    |    |    |     |   |   |    |    |    |     |

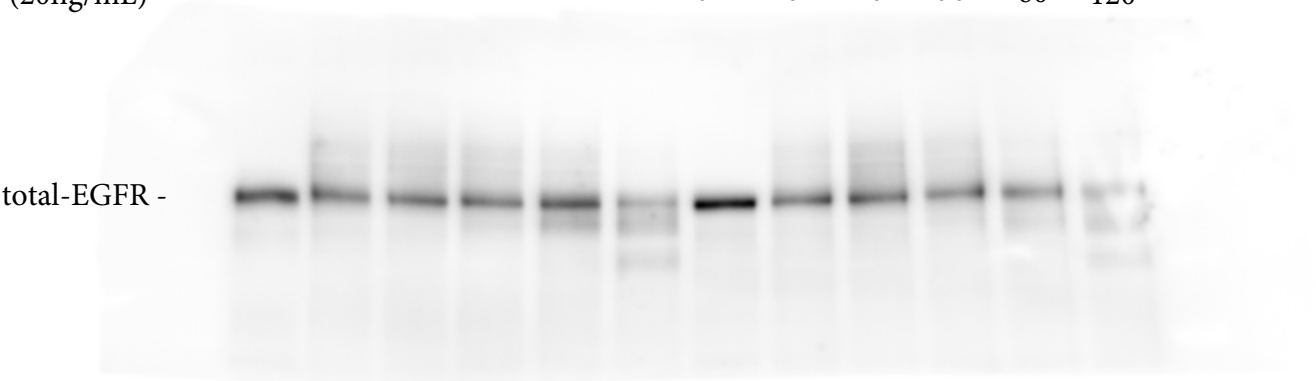

Supplement: supp [file elife-73511-supp-v1.zip]

Figure S2

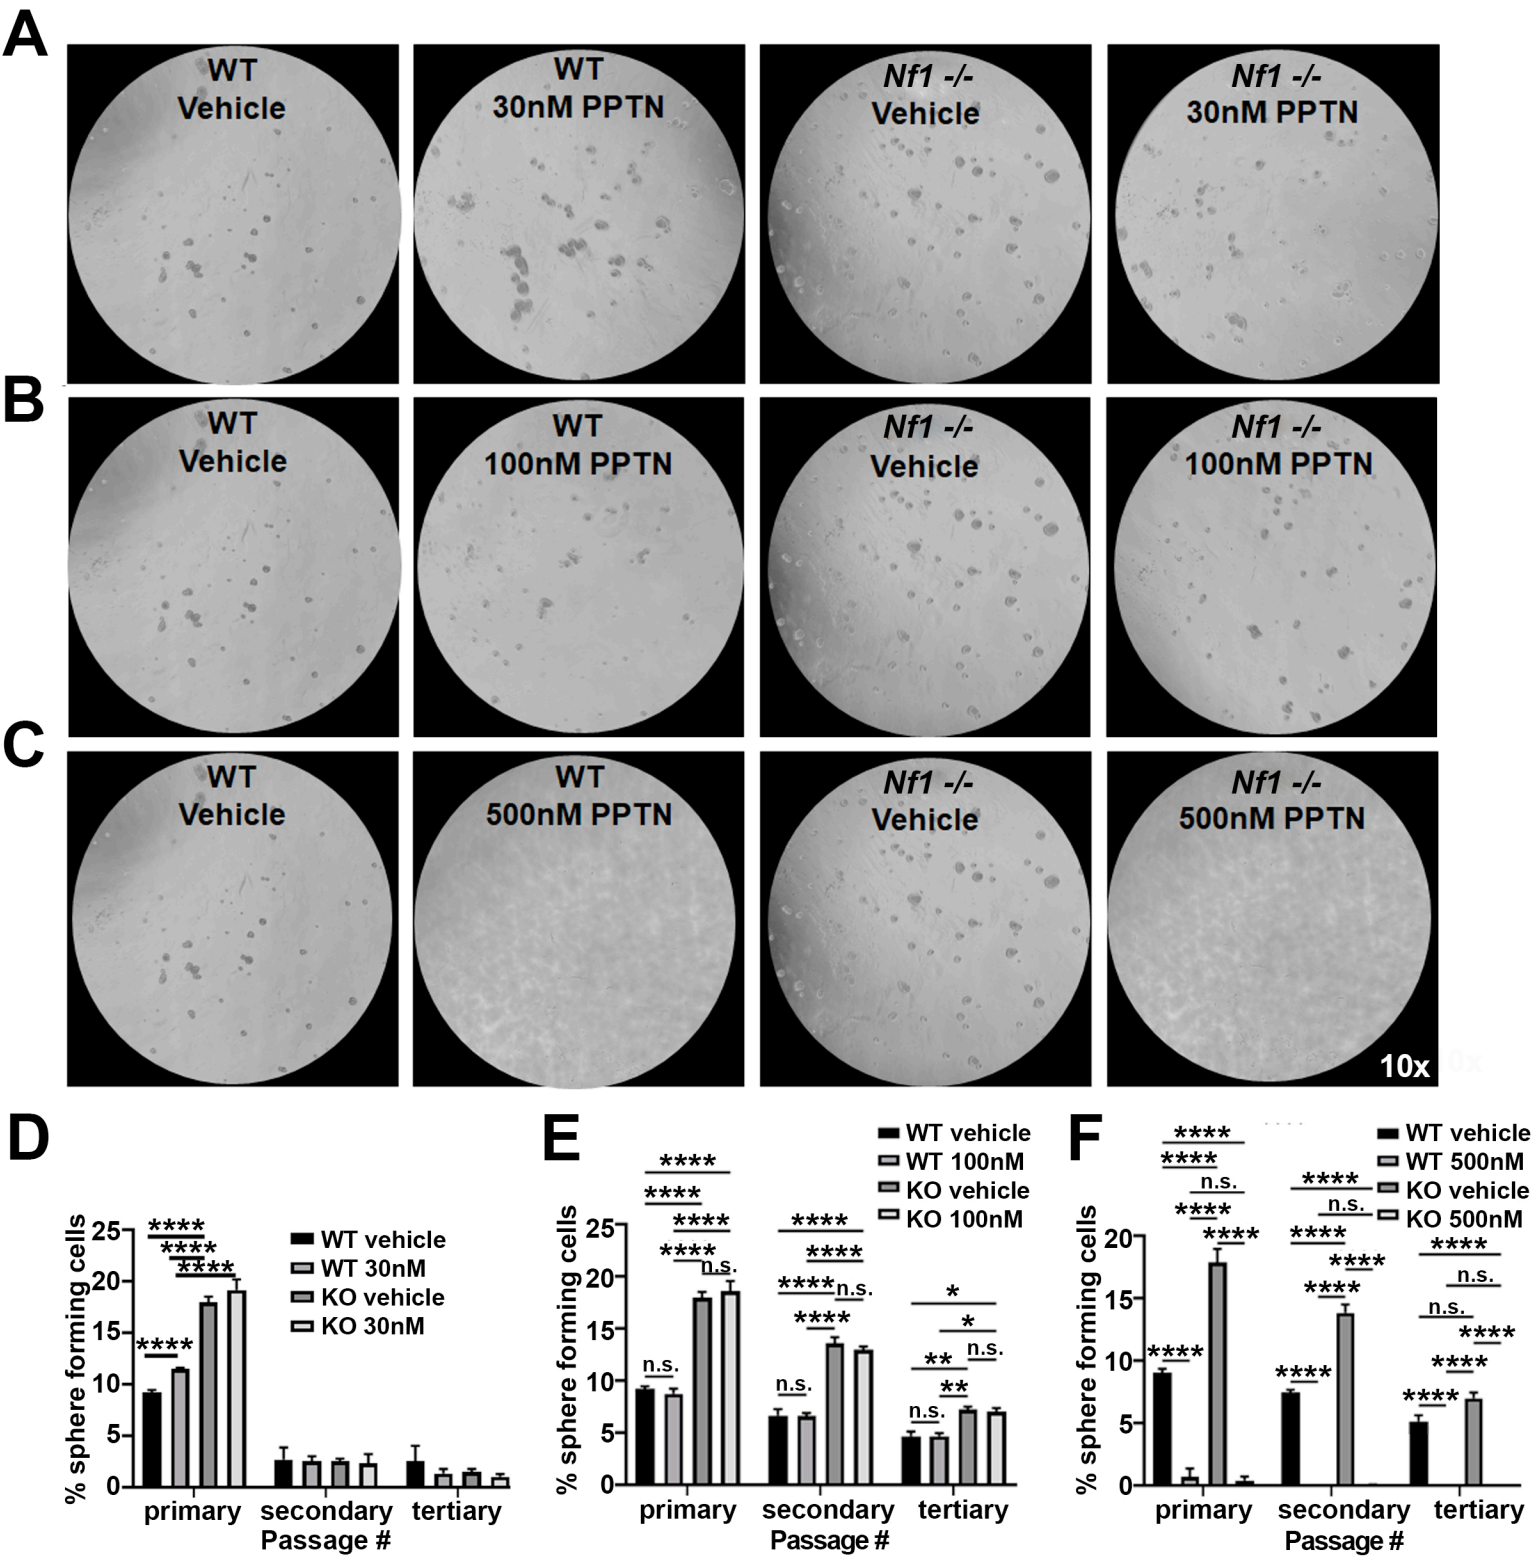

Supplement: supp [file elife-73511-supp-v1.zip]

1 lambda

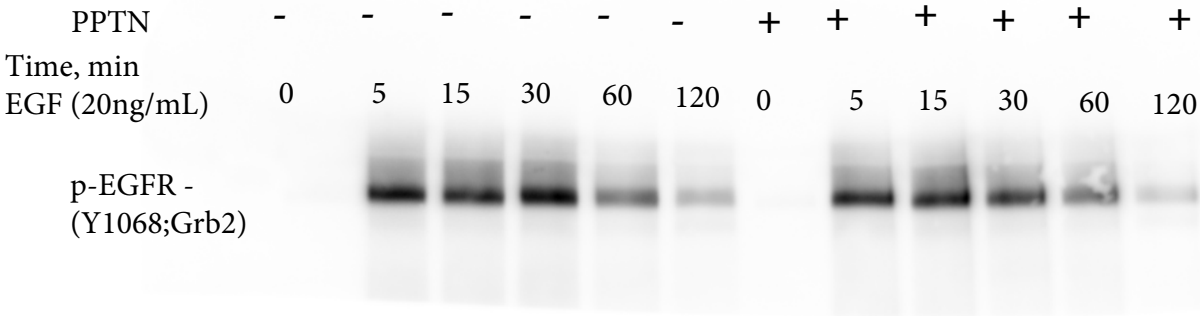

Supplement: supp [file elife-73511-supp-v1.zip]

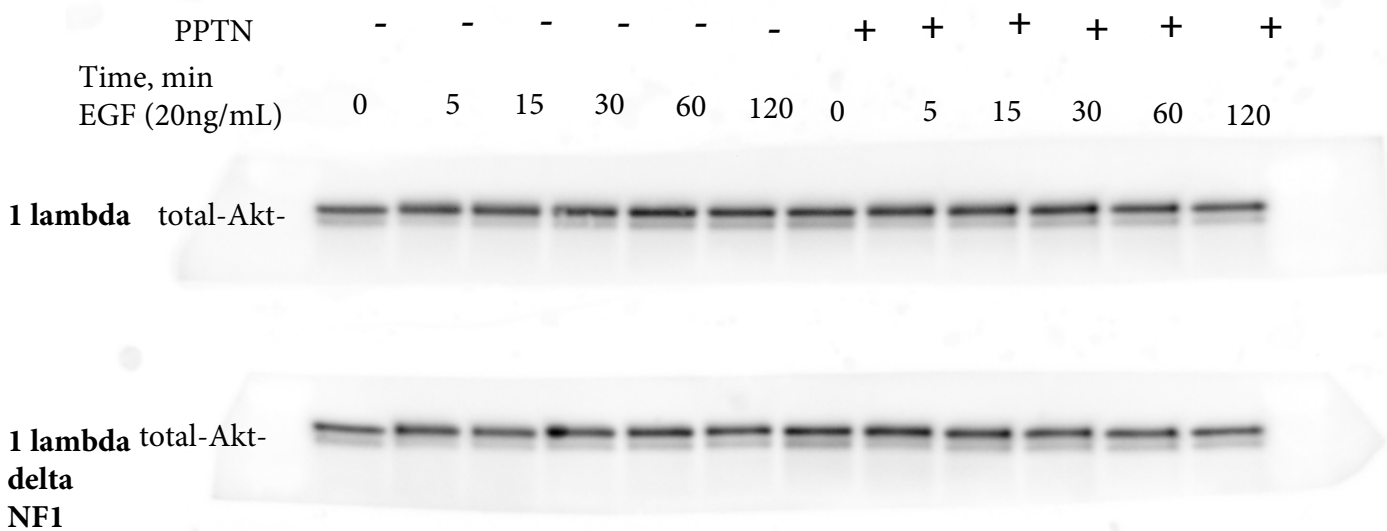

Supplement: supp [file elife-73511-supp-v1.zip]

ST88-14 MPNST cells

|         |           |   |    |    |    |    |   |   |    |    |    |    |
|---------|-----------|---|----|----|----|----|---|---|----|----|----|----|
| P2RY14i | -         | - | -  | -  | -  | -  | + | + | +  | +  | +  | +  |
| EGF     | 0         | 5 | 10 | 15 | 20 | 30 | 0 | 5 | 10 | 15 | 20 | 30 |
|         | EGF (min) |   |    |    |    |    |   |   |    |    |    |    |

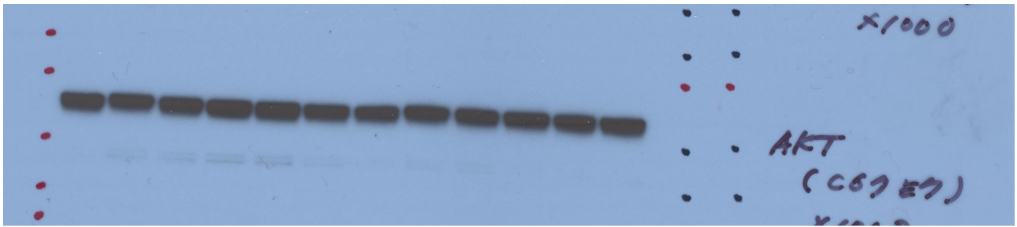

Supplement: supp [file elife-73511-supp-v1.zip]

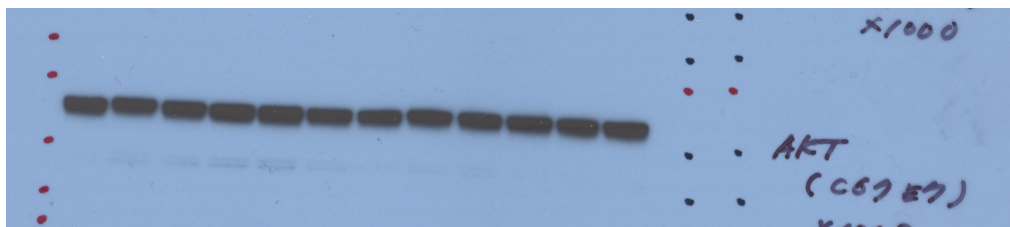

Supplement: supp [file elife-73511-supp-v1.zip]

8/27/08  
Actin

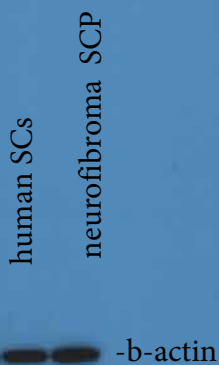

Supplement: supp [file elife-73511-supp-v1.zip]

**neurofibroma**

**Nf1 fl/fl** **P2RY14**  
**Dhh+** **Nf1 fl/fl**  
**Dhh+**

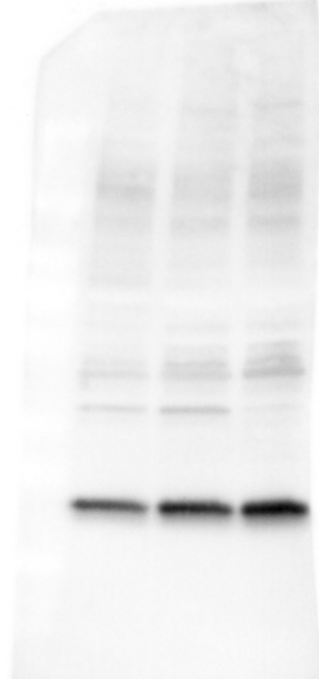

**- P2RY14**

Supplement: supp [file elife-73511-supp-v1.zip]

**neurofibroma**

**Nf1 fl/fl  
Dhh+**

**P2RY14  
Nf1 fl/fl  
Dhh+**

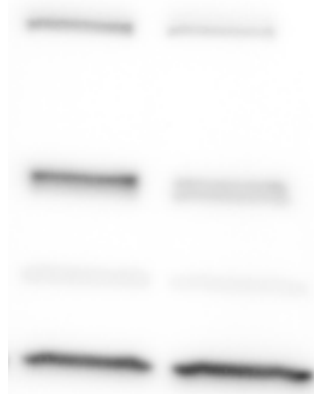

**- P2RY14**

Supplement: supp [file elife-73511-supp-v1.zip]

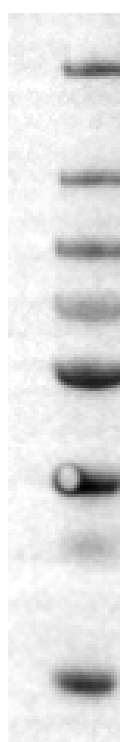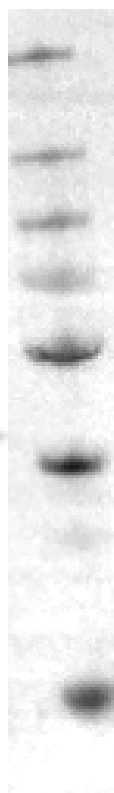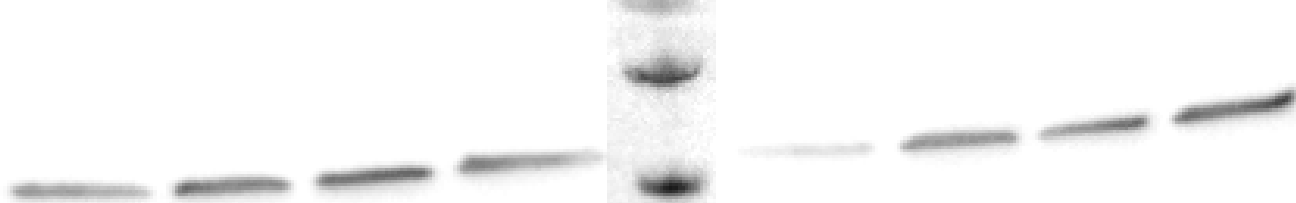

Supplement: supp [file elife-73511-supp-v1.zip]

20 min

|        |   |   |      |     |     |     |
|--------|---|---|------|-----|-----|-----|
| p2814: | - | - | 62.5 | 125 | 250 | 500 |
| EGF    | - | + | +    | +   | +   | +   |

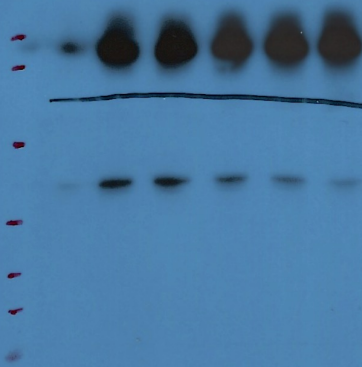

Supplement: supp [file elife-73511-supp-v1.zip]

Nf1<sup>-/-</sup>

shNT  
shP2RY14



-pERK1/2

Supplement: supp [file elife-73511-supp-v1.zip]

Nf1<sup>-/-</sup>

shNT

shP2RY14

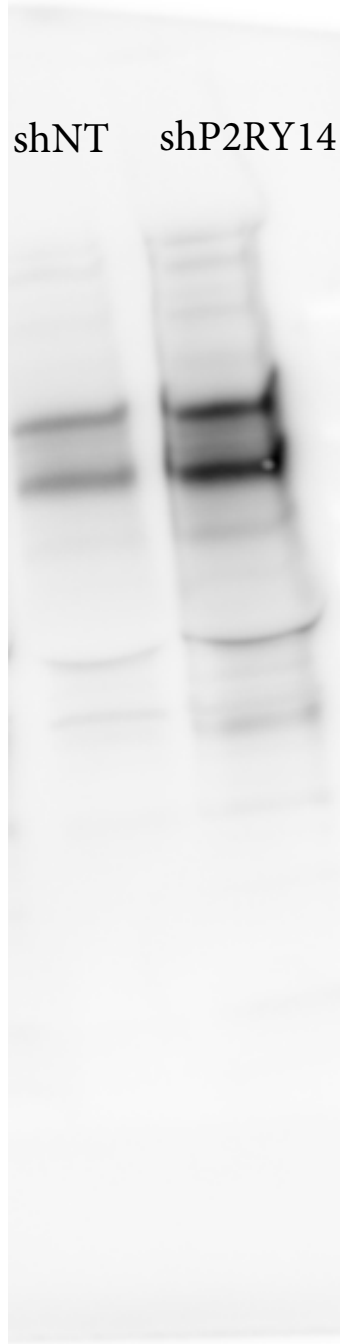

Supplement: supp [file elife-73511-supp-v1.zip]

# 1 lambda

| PPTN          | - | - | -  | -  | -  | -   | + | + | +  | +  | +  | +   |
|---------------|---|---|----|----|----|-----|---|---|----|----|----|-----|
| Time, min     | 0 | 5 | 15 | 30 | 60 | 120 | 0 | 5 | 15 | 30 | 60 | 120 |
| EGF (20ng/mL) |   |   |    |    |    |     |   |   |    |    |    |     |

total-EGFR-

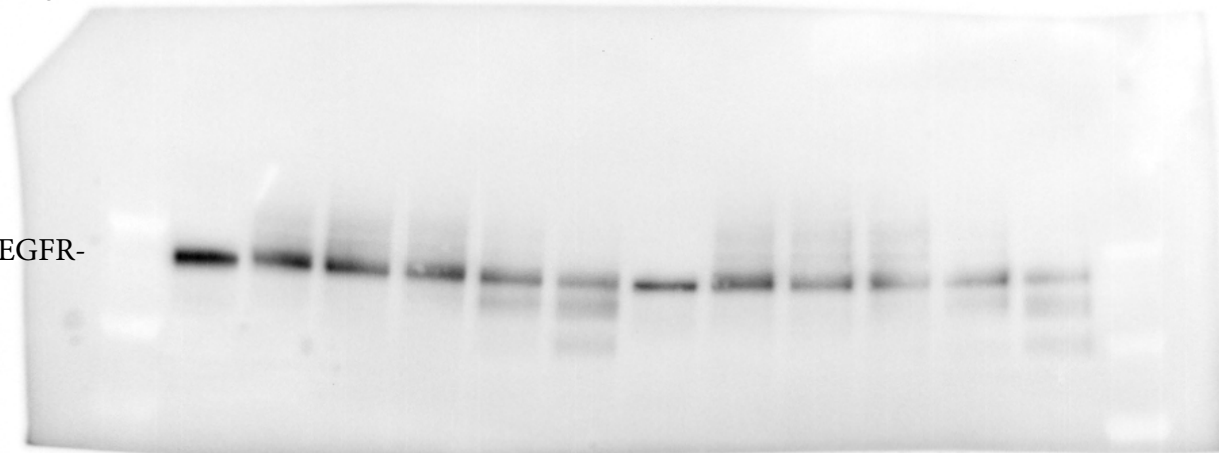

Supplement: supp [file elife-73511-supp-v1.zip]

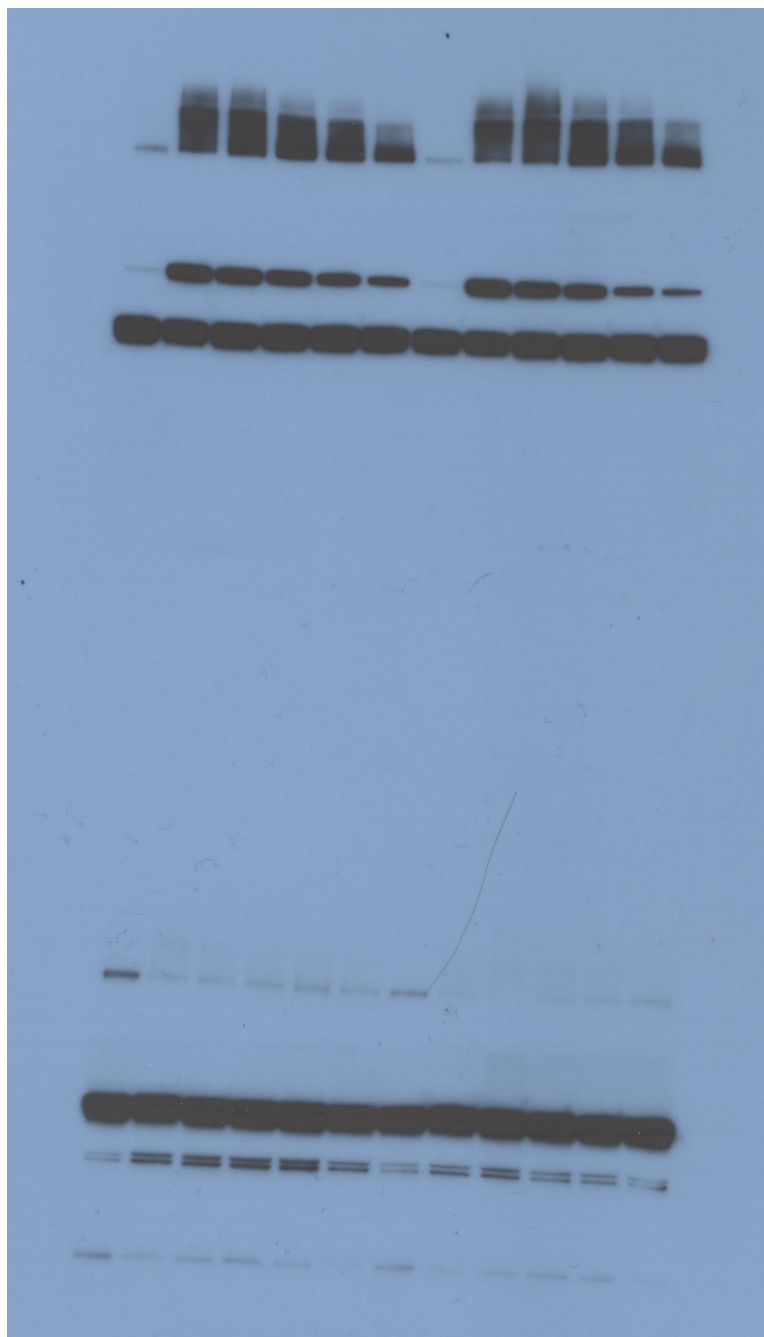

Supplement: supp [file elife-73511-supp-v1.zip]

**1 lambda delta Nf1**

|               |   |   |    |    |    |     |   |   |    |    |    |     |
|---------------|---|---|----|----|----|-----|---|---|----|----|----|-----|
| PPTN          | - | - | -  | -  | -  | -   | + | + | +  | +  | +  | +   |
| Time, min     | 0 | 5 | 15 | 30 | 60 | 120 | 0 | 5 | 15 | 30 | 60 | 120 |
| EGF (20ng/mL) |   |   |    |    |    |     |   |   |    |    |    |     |

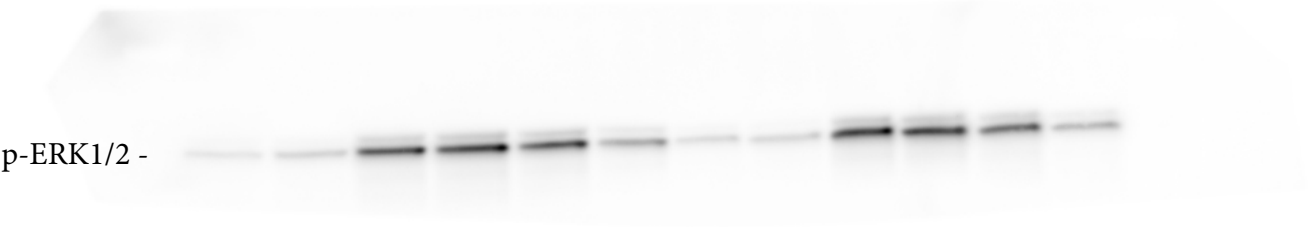

p-ERK1/2 -

Supplement: supp [file elife-73511-supp-v1.zip]

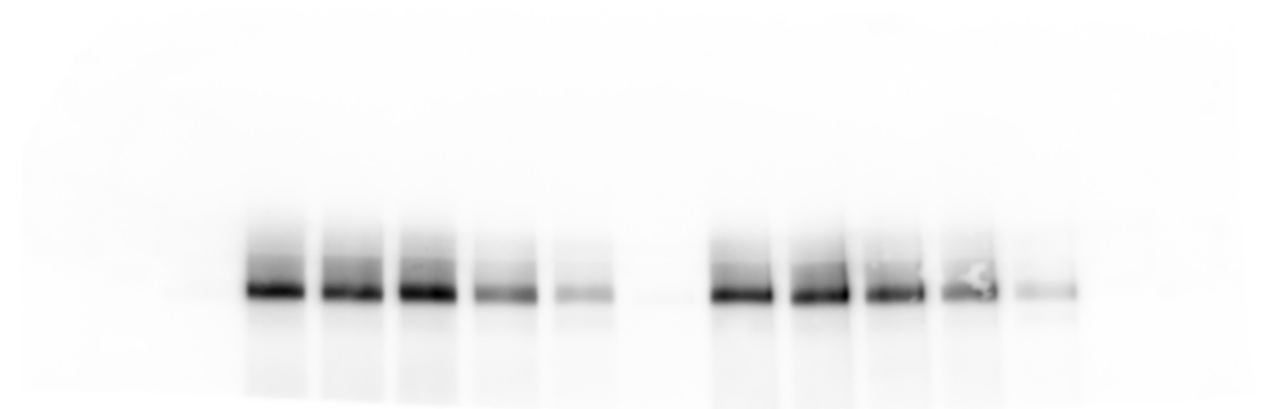

Supplement: supp [file elife-73511-supp-v1.zip]

**A**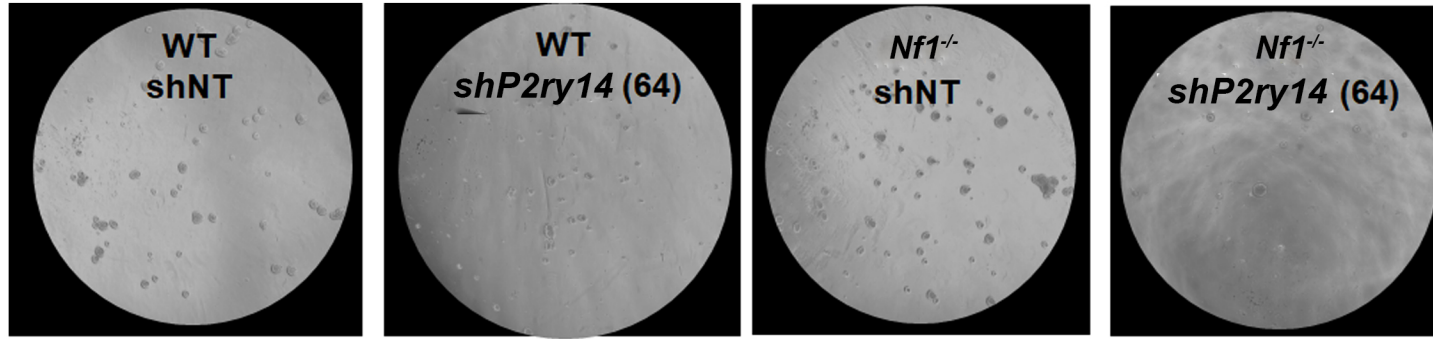**C**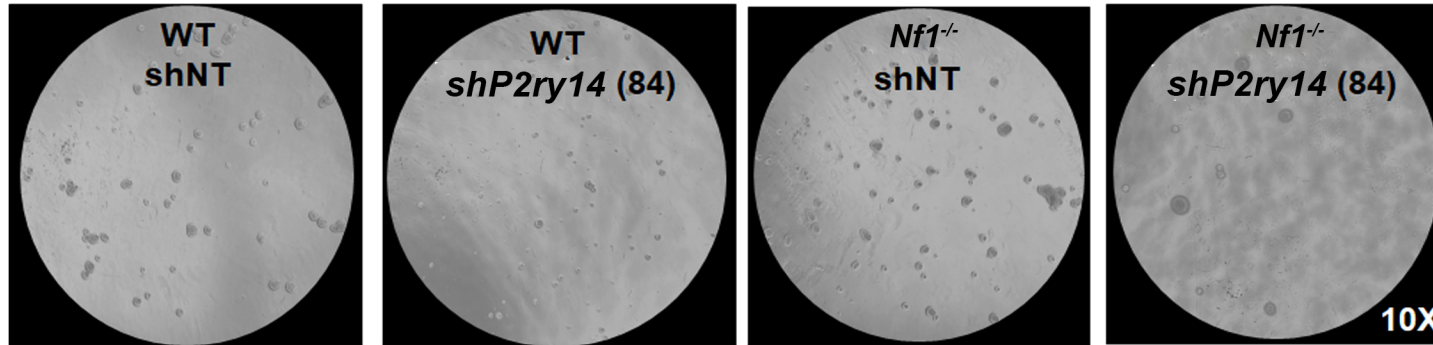**B**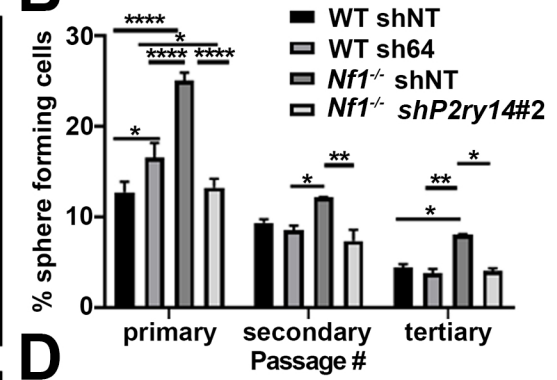**D**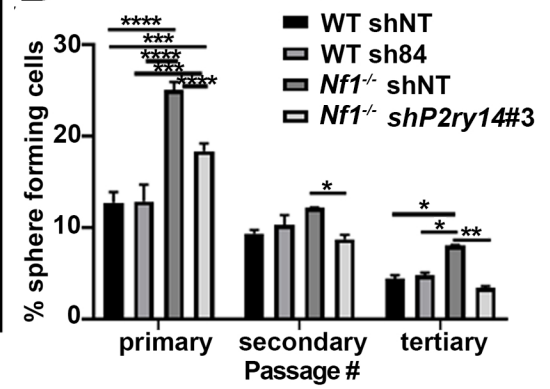

Supplement: supp [file elife-73511-supp-v1.zip]
